# Supplementary material for: Isolation and Characterization of Two Novel Siphoviruses Novomoskovsk and Bolokhovo, Encoding Polysaccharide Depolymerases Active against Bacillus pumilus
Source: MDPI journal article supplement (doi:10.3390/ijms232112988), 2022-10-26
Supplement: s1 [file s1]

# **Isolation and Characterization of Two Novel Siphoviruses Novomoskovsk And Bolokhovo Encoding Polysaccharide Depolymerases Active Against *Bacillus pumilus***

**Anna V. Skorynina<sup>1\*</sup>, Olga N. Koposova<sup>1</sup>, Olesya A. Kazantseva<sup>1</sup>, Emma G. Pilgrimova<sup>1</sup>, Natalya A. Ryabova<sup>2</sup> and Andrey M. Shadrin<sup>1\*</sup>**

<sup>1</sup> G.K. Skryabin Institute of Biochemistry and Physiology of Microorganisms, Pushchino Scientific Center for Biological Research of the Russian Academy of Sciences, Federal Research Center, Pushchino, Prospect Nauki, 5, Russia

<sup>2</sup> Institute of Protein Research RAS, Pushchino, Institutskaya st., 4, Russia

\* Correspondence: Anna V. Skorynina, Phone: +7(953)967-44-37. E-mail: s\_an.net@mail.ru; Andrey M Shadrin, E-mail: andrey2010s@gmail.com.

**Supplementary Information:**

Table S1. Annotation of the *Bacillus* phage Bolokhovo

| ORF№ | Start codon | Stop codon | Strand | Blast results                                                       |                   | Conserved domains, Blast |       | Hhpred results                                                                          | Annotation                           |
|------|-------------|------------|--------|---------------------------------------------------------------------|-------------------|--------------------------|-------|-----------------------------------------------------------------------------------------|--------------------------------------|
|      |             |            |        | Name                                                                | E-val             | Name, (region)           | E-val | (Prob./E-val)                                                                           |                                      |
| 1    | 65          | 739        | +      | putative terminase small subunit [ <i>Bacillus</i> phage 056SW001B] | 1e <sup>-77</sup> |                          |       | sm_term_P27; phage terminase, small subunit, putative, P27 family (89,28/3,6)           | putative terminase small subunit     |
|      |             |            |        | putative terminase small subunit [ <i>Bacillus</i> phage 019DV002]  | 6e <sup>-76</sup> |                          |       |                                                                                         |                                      |
|      |             |            |        | putative terminase small subunit [ <i>Bacillus</i> phage 276BB001]  | 6e <sup>-76</sup> |                          |       | Terminase_4; Phage terminase, small subunit (88,04/5,6)                                 |                                      |
|      |             |            |        | exopolyphosphatase domain protein [ <i>Geobacillus</i> phage GBK1]  | 3e <sup>-64</sup> |                          |       | COG3747; Phage terminase, small subunit [Mobilome: prophages, transposons], (86,89/9,2) |                                      |
| 2    | 858         | 1187       | +      | hp                                                                  |                   |                          |       |                                                                                         | hp                                   |
| 3    | 1533        | 1252       | -      | hp                                                                  |                   |                          |       | P2_Phage_GpR; P2 phage tail completion protein R (GpR) (90,17/1,7)                      | hp                                   |
| 4    | 1802        | 2083       | +      | hp                                                                  |                   |                          |       | hp                                                                                      | hp                                   |
| 5    | 2412        | 2134       | -      | hp                                                                  |                   |                          |       | hp                                                                                      | hp                                   |
| 6    | 2554        | 2399       | -      | hp                                                                  |                   |                          |       | PMP1_2; ATPase proteolipid family (97,25/0,002)                                         | Predicted lipoprotein signal peptide |
|      |             |            |        |                                                                     |                   |                          |       | Mucin15; Cell-membrane associated Mucin15 (97,22/0,00073)                               |                                      |

|    |      |      |   |                                                                 |     |                         |                      |                                                                                                          |                         |
|----|------|------|---|-----------------------------------------------------------------|-----|-------------------------|----------------------|----------------------------------------------------------------------------------------------------------|-------------------------|
|    |      |      |   |                                                                 |     |                         |                      | PRIMA1; Proline-rich membrane anchor (1 96,09/0,015)                                                     |                         |
|    |      |      |   |                                                                 |     |                         |                      | STEVOR; variant surface antigen, stevor family, (95,68/0,058)                                            |                         |
| 7  | 2968 | 2633 | - | hp                                                              |     |                         |                      | hp                                                                                                       | hp                      |
| 8  | 3304 | 3047 | - | hp                                                              |     |                         |                      | hp                                                                                                       | hp                      |
| 9  | 3408 | 5093 | + | terminase large subunit [ <i>Bacillus</i> virus Glittering]     | 0.0 | Terminase_GpA (52-314)  | 6.85e <sup>-06</sup> | Terminase_GpA; Phage terminase large subunit (GpA) (100/6,4e <sup>-32</sup> )                            | Terminase large subunit |
|    |      |      |   | terminase large subunit [ <i>Bacillus</i> virus Riggi]          | 0.0 |                         |                      | Terminase_1; Phage Terminase (100/1,2e <sup>-30</sup> )                                                  |                         |
|    |      |      |   | terminase large subunit [ <i>Bacillus</i> virus Blastoid]       | 0.0 |                         |                      | YbcX; Phage terminase, large subunit GpA (99,98/4,1e <sup>-28</sup> )                                    |                         |
| 10 | 5175 | 6494 | + | portal protein [ <i>Bacillus</i> virus Curly]                   | 0.0 | DUF935 (57-394)         | 7.58e <sup>-21</sup> | gp29; Mu-like prophage protein gp29 (100/6,1e <sup>-30</sup> )                                           | portal protein          |
|    |      |      |   | portal protein [ <i>Bacillus</i> virus Glittering]              | 0.0 | gp29 (92-413)           | 4.39e <sup>-09</sup> | portal_HK97; phage portal protein, HK97 family (99,97/2,5e <sup>-28</sup> )                              |                         |
|    |      |      |   | portal protein [ <i>Bacillus</i> phage Leo2]                    | 0.0 |                         |                      | BeeE; Phage portal protein BeeE (99,97/1,1e <sup>-28</sup> )                                             |                         |
| 11 | 6548 | 7450 | + | phage head morphogenesis protein [ <i>Bacillus</i> virus Curly] | 0.0 | phageSPP1_gp7 (150-261) | 9.02e <sup>-16</sup> | COG2369; Uncharacterized conserved protein, contains phage Mu gpF-like domain (99,87/2e <sup>-19</sup> ) | Minor head protein      |
|    |      |      |   | minor head protein [ <i>Bacillus</i> virus Glittering]          | 0.0 | Phage_Mu_F (144-254)    | 9.57e <sup>-15</sup> | phageSPP1_gp7; phage putative head morphogenesis protein, SPP1_gp7 family (99,83/1,2e <sup>-19</sup> )   |                         |
|    |      |      |   | minor head protein [ <i>Bacillus</i> phage Leo2]                | 0.0 | COG2369 (150-261)       | 1.50e <sup>-04</sup> | COG5585; NAD <sup>+</sup> --asparagine ADP-ribosyltransferase (99,72/1,3e <sup>-15</sup> )               |                         |
| 12 | 7953 | 7483 | - | hp                                                              |     |                         |                      | YifL; Predicted small periplasmic lipoprotein YifL (98,6/2,8e <sup>-7</sup> )                            | hp                      |

|    |      |       |   |                                                                |                    |  |  |                                                                                                                          |                                             |
|----|------|-------|---|----------------------------------------------------------------|--------------------|--|--|--------------------------------------------------------------------------------------------------------------------------|---------------------------------------------|
|    |      |       |   |                                                                |                    |  |  | Lysis_col; Lysis protein<br>(97,41/0,00023)                                                                              |                                             |
|    |      |       |   |                                                                |                    |  |  | Slp; Starvation-inducible outer<br>membrane lipoprotein,<br>97,11/0,00057                                                |                                             |
|    |      |       |   |                                                                |                    |  |  | COG5510; Predicted small<br>secreted protein,<br>(96,95/0,0014)                                                          |                                             |
| 13 | 8075 | 7950  | - | ribonuclease [ <i>Bacillus</i><br>phage Leo2]                  | 3e <sup>-17</sup>  |  |  | hp                                                                                                                       | hp                                          |
| 14 | 8461 | 9303  | + | scaffold protein<br>[ <i>Bacillus</i> virus Curly]             | 0.0                |  |  | Mu-like_Pro; Mu-like prophage I<br>protein (99,88/6,4e <sup>-21</sup> )                                                  | prohead protease                            |
|    |      |       |   | scaffold protein<br>[ <i>Bacillus</i> virus<br>Andromeda]      | 0.0                |  |  | Phage_GPO; Phage capsid<br>scaffolding protein (GPO) serine<br>peptidase (99,57/4,1e <sup>-13</sup> )                    |                                             |
|    |      |       |   | scaffold protein<br>[ <i>Bacillus</i> virus Riggi]             | 3e <sup>-170</sup> |  |  | proheadase_HK97; phage prohead<br>protease, HK97 family (99,3/7,8e <sup>-11</sup> )                                      |                                             |
|    |      |       |   |                                                                |                    |  |  | Peptidase_S78; <i>Caudovirus</i><br>prohead serine protease<br>(99,14/1,2e <sup>-9</sup> )                               |                                             |
| 15 | 9325 | 9747  | + | hp                                                             |                    |  |  | COG5471; Predicted phage<br>recombinase, RecA/RadA family<br>(99,67/5,7e <sup>-15</sup> )                                | DUF2190<br>domain-<br>containing<br>protein |
|    |      |       |   |                                                                |                    |  |  | COG5471; Predicted phage<br>recombinase, RecA/RadA family<br>(86,05/7,4)                                                 |                                             |
| 16 | 9767 | 10657 | + | major capsid protein<br>[ <i>Bacillus</i> virus<br>Glittering] | 0.0                |  |  | d,183,1,1 (A:104-383) Major<br>capsid protein gp5 {Bacteriophage<br>HK97 [TaxId: 37554]}<br>(99,95/4,6e <sup>-27</sup> ) | Major capsid<br>protein                     |
|    |      |       |   | major capsid protein<br>[ <i>Bacillus</i> phage Leo2]          | 0.0                |  |  | major_cap_HK97; phage major<br>capsid protein, HK97 family                                                               |                                             |

|    |       |       |   |                                                                            |                   |                      |                      |                                                                                                                   |                         |
|----|-------|-------|---|----------------------------------------------------------------------------|-------------------|----------------------|----------------------|-------------------------------------------------------------------------------------------------------------------|-------------------------|
|    |       |       |   |                                                                            |                   |                      |                      | (99,93/1,5e <sup>-24</sup> )                                                                                      |                         |
|    |       |       |   | major capsid protein<br>[ <i>Bacillus</i> virus Riggi]                     | 0.0               |                      |                      | COG4653; Predicted phage phi-C31 gp36 major capsid-like protein (99,93/8,4e <sup>-25</sup> )                      |                         |
| 17 | 10732 | 10953 | + | hp                                                                         |                   |                      |                      | Ribosomal_L9_N; Ribosomal protein L9, N-terminal domain (95,15/0,039)                                             | hp                      |
|    |       |       |   |                                                                            |                   |                      |                      | d,100,1,1 (A:1-52) Ribosomal protein L9 N-domain { <i>Bacillus stearothermophilus</i> [TaxId: 1422]} (93,69/0,15) |                         |
|    |       |       |   |                                                                            |                   |                      |                      | d,100,1,1 (I:1-55) Ribosomal protein L9 N-domain { <i>Thermus thermophilus</i> [TaxId: 274]} (91,77/0,35)         |                         |
|    |       |       |   |                                                                            |                   |                      |                      | Packaging_FI; DNA packaging protein FI (90,85/0,42)                                                               |                         |
| 18 | 10967 | 11359 | + | head-to-tail adaptor<br>[ <i>Bacillus</i> phage 056SW001B]                 | 4e <sup>-26</sup> | DUF1320 (2-65)       | 2.42e <sup>-06</sup> | gp436; Mu-like prophage protein gp36 (99,88/5e <sup>-21</sup> )                                                   | head completion protein |
|    |       |       |   | head-to-tail adaptor<br>[ <i>Bacillus</i> phage 276BB001]                  | 6e <sup>-26</sup> | gp436 (2-122)        | 7.41e <sup>-03</sup> | Phage_connect_1; Phage gp6-like head-tail connector protein (98,76/1,3e <sup>-7</sup> )                           |                         |
|    |       |       |   | head-to-tail adaptor<br>[ <i>Bacillus</i> phage 019DV002]                  | 1e <sup>-25</sup> |                      |                      |                                                                                                                   |                         |
| 19 | 11364 | 11807 | + | tail completion and head joining protein<br>[ <i>Bacillus</i> virus Riggi] | 6e <sup>-72</sup> | COG5005 (4-147)      | 9.42e <sup>-13</sup> | Phage_tail_S; Phage virion morphogenesis family (99,85/5,7e <sup>-21</sup> )                                      | tail completion protein |
|    |       |       |   | tail completion and head joining protein<br>[ <i>Bacillus</i> virus Riggi] | 6e <sup>-72</sup> | Phage_tail_S (6-141) | 4.59e <sup>-08</sup> | COG5005; Mu-like prophage protein gpG, (99,8/2,6e <sup>-18</sup> )                                                |                         |
|    |       |       |   | head-to-tail stopper<br>[ <i>Bacillus</i> phage 276BB001]                  | 2e <sup>-52</sup> |                      |                      | tail_comp_S; phage virion morphogenesis (putative tail completion) protein, (99,79/2,7e <sup>-</sup>              |                         |

|    |       |       |   |                                                                                  |                    |  |  |                                                                                                                                                                        |                            |
|----|-------|-------|---|----------------------------------------------------------------------------------|--------------------|--|--|------------------------------------------------------------------------------------------------------------------------------------------------------------------------|----------------------------|
|    |       |       |   |                                                                                  |                    |  |  | <sup>18)</sup>                                                                                                                                                         |                            |
| 20 | 11804 | 12232 | + | tail terminator<br>[ <i>Bacillus</i> phage<br>019DV002]                          | 4e <sup>-37</sup>  |  |  | Phage_tail_U; Phage minor tail<br>protein U (99,66/2,6e <sup>-14</sup> )                                                                                               | tail terminator<br>protein |
|    |       |       |   |                                                                                  |                    |  |  | Gp37; Gp37 protein (97,15/0,016)                                                                                                                                       |                            |
| 21 | 12244 | 12420 | + | hp                                                                               |                    |  |  | hp                                                                                                                                                                     | hp                         |
| 22 | 12420 | 13358 | + | major tail protein<br>[ <i>Bacillus</i> phage<br>019DV002]                       | 9e <sup>-106</sup> |  |  | DUF2001; Phage tail tube protein<br>98,49/b,106,1,3 (A:5-143)<br>Phage-like element PBSX protein<br>XkdM { <i>Bacillus subtilis</i> [TaxId:<br>1423]} (98,24/0,000014) | tail tube protein          |
|    |       |       |   |                                                                                  |                    |  |  | Phage_tail_2; Phage tail tube<br>protein (93,86/2,2)                                                                                                                   |                            |
|    |       |       |   |                                                                                  |                    |  |  |                                                                                                                                                                        |                            |
| 23 | 13383 | 13724 | + | tail assembly<br>chaperone [ <i>Bacillus</i><br>phage 019DV002]                  | 7e <sup>-19</sup>  |  |  | Phage_TAC_4; Phage tail<br>assembly chaperone (98,68/5,9e <sup>-7</sup> )                                                                                              | tail assembly<br>chaperone |
|    |       |       |   | tail assembly<br>chaperone [ <i>Bacillus</i><br>phage 019DV002]                  | 6e <sup>-18</sup>  |  |  | Phage_TAC_1; Phage tail<br>assembly chaperone<br>(98,51/0,0000046)                                                                                                     |                            |
|    |       |       |   | tail assembly<br>chaperone [ <i>Bacillus</i><br>phage 276BB001]                  | 7e <sup>-14</sup>  |  |  | Phage_TAC_14; Phage tail<br>assembly chaperone protein, TAC<br>(97,93/0,00022)                                                                                         |                            |
| 24 | 13769 | 13966 | + | aldolase/citrate lyase<br>family protein<br>[ <i>Bacillus</i> virus<br>Blastoid] | 1e <sup>-11</sup>  |  |  | Phage_P2_GpE; Phage P2 GpE<br>(98,53/3,9e <sup>-8</sup> )                                                                                                              | tail assembly<br>chaperone |
|    |       |       |   | tail assembly<br>chaperone [ <i>Bacillus</i><br>phage 276BB001]                  | 1e <sup>-10</sup>  |  |  | Phage_TAC_6; Phage tail<br>assembly chaperone protein, TAC<br>(96,41/0,013)                                                                                            |                            |

|    |       |       |   |                                                                                         |            |                           |               |                                                                                                                         |                                   |
|----|-------|-------|---|-----------------------------------------------------------------------------------------|------------|---------------------------|---------------|-------------------------------------------------------------------------------------------------------------------------|-----------------------------------|
|    |       |       |   | tail assembly chaperone [ <i>Bacillus</i> phage 019DV002]                               | $4e^{-10}$ |                           |               | phage_TIGR02216; phage conserved hypothetical protein (95,51/0,055)                                                     |                                   |
| 25 | 13978 | 16296 | + | tape measure protein [ <i>Bacillus</i> virus Taylor]                                    | 0.0        | HI1514 (62-292)           | $2.10e^{-23}$ | COG5283; Phage-related tail protein (99,26/0,000022)                                                                    | tape measure protein              |
|    |       |       |   | tail length tape measure protein [ <i>Bacillus</i> phage Carmen17]                      | $7e^{-21}$ | tape_meas_nterm (129-203) | $2.58e^{-16}$ | HI1514; Phage tail tape-measure protein, controls tail length (99,2/0,0000013)                                          |                                   |
|    |       |       |   | tail length tape measure protein [ <i>Bacillus</i> phage Wes44]                         | $7e^{-21}$ | COG5412 (153-651)         | $1.10e^{-11}$ | YqbO; Phage-related minor tail protein (98,9/0,00031)                                                                   |                                   |
| 26 | 16310 | 18805 | + | tail fiber [ <i>Bacillus</i> phage Leo2]                                                | 0.0        |                           |               | FN3; Fibronectin type 3 domain (99,74/2,1e <sup>-14</sup> )                                                             | putative tail fiber protein       |
|    |       |       |   | tail fiber [ <i>Bacillus</i> virus Blastoid]                                            | 0.0        |                           |               | Receptor mediating netrin-dependent axon guidance (99,7/4,4e <sup>-13</sup> )                                           |                                   |
|    |       |       |   | minor tail protein [ <i>Bacillus</i> phage 276BB001]                                    | 0.0        |                           |               | Neural cell adhesion molecule L1 (99,5/1,7e <sup>-10</sup> )                                                            |                                   |
| 27 | 18810 | 19109 | + | minor tail protein [ <i>Bacillus</i> phage 019DV002]                                    | $1e^{-29}$ |                           |               | hp                                                                                                                      | hp                                |
|    |       |       |   | minor tail protein [ <i>Bacillus</i> phage 276BB001]                                    | $3e^{-29}$ |                           |               |                                                                                                                         |                                   |
| 28 | 19110 | 20777 | + | putative tailspike, beta-helical glycoside hydrolase [ <i>Bacillus</i> virus Andromeda] | 0.0        | Pectate_lyase_3 (44-183)  | $6.75e^{-06}$ | RR_plus_rpt_1; twin-arg-translocated uncharacterized repeat protein (99,94/5,9e <sup>-22</sup> )                        | Pectate lyase superfamily protein |
|    |       |       |   | putative tailspike, beta-helical glycoside [ <i>Bacillus</i> phage Gemini]              | 0.0        | NosD (355-553)            | $5.33e^{-05}$ | b,80,1,3 (A:) Rhamnogalacturonase A {Fungus ( <i>Aspergillusaculeatus</i> ) [TaxId: 5053]} (99,86/5,4e <sup>-19</sup> ) |                                   |

|    |       |       |   |                                                                                     |                    |                   |                      |                                                                                                                            |                       |
|----|-------|-------|---|-------------------------------------------------------------------------------------|--------------------|-------------------|----------------------|----------------------------------------------------------------------------------------------------------------------------|-----------------------|
|    |       |       |   | tailspike [ <i>Bacillus</i> virus Curly]                                            | 0.0                |                   |                      | b,80,1,3 (A:) Rhamnogalacturonase A {Fungus ( <i>Aspergillus aculeatus</i> ) [TaxId: 5053]} (99,86/5,4e <sup>-19</sup> )   |                       |
|    |       |       |   |                                                                                     |                    |                   |                      | b,80,1,3 (A:) Polygalacturonase { <i>Erwinia carotovora</i> , subsp, carotovora [TaxId: 554]} (99,82/1,5e <sup>-16</sup> ) |                       |
| 29 | 20790 | 21740 | + | minor tail protein [ <i>Bacillus</i> phage 019DV002]                                | 8e <sup>-144</sup> |                   |                      | Phage_GPD; Phage late control gene D protein (GPD) (99,95/1,7e <sup>-24</sup> )                                            | Baseplate hub protein |
|    |       |       |   | minor tail protein [ <i>Bacillus</i> phage 276BB001]                                | 3e <sup>-143</sup> |                   |                      | COG4379; Mu-like prophage tail protein gpP (99,94/7e <sup>-23</sup> )                                                      |                       |
|    |       |       |   | minor tail protein [ <i>Microbacterium</i> phage Alakazam]                          | 8e <sup>-21</sup>  |                   |                      | VI_Rhs_Vgr; type VI secretion system Vgr family protein, (99,9/8,4e <sup>-21</sup> )                                       |                       |
|    |       |       |   |                                                                                     |                    |                   |                      | Prophage_tail; Prophage endopeptidase tail (99,84/1,9e <sup>-18</sup> )                                                    |                       |
| 30 | 21737 | 21988 | + | collagen triple helix repeat containing protein [ <i>Bacillus</i> phage vB_BpsS-36] | 3e <sup>-18</sup>  |                   |                      | gp45; Mu-like prophage protein gp45 (98,24/0,000022)                                                                       | Tail spike protein    |
|    |       |       |   |                                                                                     |                    |                   |                      | Phage_base_V; Type VI secretion system, phage-baseplate injector (98/0,0001)                                               |                       |
|    |       |       |   |                                                                                     |                    |                   |                      | b,40,8,1 (A:6-129) Tail-associated lysozyme gp5, N-terminal domain {Bacteriophage T4 [TaxId: 10665]} (97,84/0,00033)       |                       |
| 31 | 22004 | 22420 | + | phosphodiesterase [ <i>Bacillus</i> virus Blastoid]                                 | 6e <sup>-89</sup>  | PRK12704 (13-134) | 2.49e <sup>-04</sup> | GvpP; Gas vesicle protein (98,44/0,000079)                                                                                 | putative holin        |
|    |       |       |   | phosphodiesterase [ <i>Bacillus</i> virus Riggi]                                    | 3e <sup>-86</sup>  |                   |                      | RNase_Y; ribonuclease Y (98,29/0,00023)                                                                                    |                       |
|    |       |       |   | transposase [ <i>Bacillus</i> phage Leo2]                                           | 2e <sup>-85</sup>  | IATP (37-74)      | 2.53e <sup>-03</sup> | EnvC; Septal ring factor EnvC, activator of murein hydrolases                                                              |                       |



|    |       |       |   |                                                                  |                   |                      |                      |                                                                                                                                   |                                     |
|----|-------|-------|---|------------------------------------------------------------------|-------------------|----------------------|----------------------|-----------------------------------------------------------------------------------------------------------------------------------|-------------------------------------|
|    |       |       |   |                                                                  |                   |                      |                      | AmiA and AmiB (97,960,0044)                                                                                                       |                                     |
|    |       |       |   | holin [ <i>Bacillus</i> phage 019DV002]                          | 2e <sup>-23</sup> | RNase_Y (15-131)     | 5.13e <sup>-03</sup> | Holin_BhlA; BhlA holin family (97,78/0,0014)                                                                                      |                                     |
| 32 | 22432 | 23331 | + | cell wall hydrolase/autolysin [ <i>Bacillus</i> virus Andromeda] | 0.0               | MurNAc-LAA (3-180)   | 3.35e <sup>-62</sup> | c,56,5,6 (A:) N-acetylmuramoyl-L-alanine amidase CwlV { <i>Paenibacillus polymyxa</i> [TaxId: 1406]} (99,97/2,7e <sup>-28</sup> ) | N-acetylmuramoyl-L-alanine amidase  |
|    |       |       |   |                                                                  |                   | Amidase_3 (4-179)    | 4.30e <sup>-55</sup> |                                                                                                                                   |                                     |
|    |       |       |   | cell wall hydrolase/autolysin [ <i>Bacillus</i> virus Andromeda] | 0.0               | Ami_3 (64-179)       | 3.29e <sup>-30</sup> | spore_cwlD; N-acetylmuramoyl-L-alanine amidase CwlD (99,95/3e <sup>-26</sup> )                                                    |                                     |
|    |       |       |   |                                                                  |                   | spore_cwlD (2-179)   | 9.79e <sup>-29</sup> |                                                                                                                                   |                                     |
|    |       |       |   | endolysin [ <i>Bacillus</i> virus Glittering]                    | 0.0               | mltD (208-299)       | 5.02e <sup>-23</sup> | c,56,5,6 (A:1-180) Endolysin Ply, catalytic domain {Bacteriophage Psa [TaxId: 171618]} (99,95/1,4e <sup>-25</sup> )               |                                     |
|    |       |       |   |                                                                  |                   | LysM (209-251)       | 7.49e <sup>-16</sup> |                                                                                                                                   |                                     |
|    |       |       |   |                                                                  |                   | spore_safA (211-250) | 2.03e <sup>-04</sup> |                                                                                                                                   |                                     |
| 33 | 23416 | 23625 | + | holin [ <i>Bacillus</i> virus Glittering]                        | 7e <sup>-42</sup> |                      |                      | Phage_holin_1; Bacteriophage holing (99,04/1,1e <sup>-9</sup> )                                                                   | holin                               |
|    |       |       |   |                                                                  |                   |                      |                      | holin_phiLC3; holin, phage phi LC3 family (98,97/1,7e <sup>-9</sup> )                                                             |                                     |
| 34 | 23800 | 24165 | + | hp                                                               |                   |                      |                      | hp                                                                                                                                | hp                                  |
| 35 | 24338 | 25231 | + | ssDNA binding protein [ <i>Bacillus</i> phage 019DV002]          | 2e <sup>-96</sup> |                      |                      | gp32; gp32 DNA binding protein like (99,88/1,8e <sup>-21</sup> )                                                                  | Single-stranded DNA-binding protein |
|    |       |       |   | phosphoesterase [ <i>Geobacillus</i> phage GBK1]                 | 4e <sup>-57</sup> |                      |                      |                                                                                                                                   |                                     |
| 36 | 25237 | 25590 | + | hp                                                               |                   |                      |                      | hp                                                                                                                                | hp                                  |
| 37 | 25637 | 26860 | + | helicase [ <i>Bacillus</i> virus Curly]                          | 0.0               | DnaB (17-429)        | 1.47e <sup>-48</sup> | DnaB; Replicative DNA helicase (100/1,6e <sup>-35</sup> )                                                                         | DnaB-like replicative helicase      |
|    |       |       |   | helicase [ <i>Bacillus</i> virus Curly]                          | 0.0               | PRK08840 (49-376)    | 6.93e <sup>-24</sup> | DnaB; replicative DNA helicase, This model describes the helicase DnaB, a homohexameric protein                                   |                                     |

|    |       |       |   |                                                             |                   |                           |                      |                                                                                                                 |                                  |
|----|-------|-------|---|-------------------------------------------------------------|-------------------|---------------------------|----------------------|-----------------------------------------------------------------------------------------------------------------|----------------------------------|
|    |       |       |   |                                                             |                   |                           |                      | required for DNA replication (100/1,3e <sup>-34</sup> )                                                         |                                  |
|    |       |       |   | DNA helicase [Bacillus virus Glittering]                    | 0.0               | DnaB_C (201-376)          | 4.40e <sup>-20</sup> | phage_DnaB; phage replicative helicase, DnaB family, HK022 subfamily, (100/5,1e <sup>-33</sup> )                |                                  |
| 38 | 26853 | 27863 | + | primase [Bacillus virus Andromeda]                          | 0.0               | dnaG (7-313)              | 7.97e <sup>-32</sup> | dnaG; DNA primase, catalytic core, (100/1e <sup>-38</sup> )                                                     | DnaG-like primase                |
|    |       |       |   | primase [Bacillus virus Curly]                              | 0.0               | Toprim_2 (226-308)        | 3.07e <sup>-14</sup> | DnaG; DNA primase (bacterial type), (100/1,9e <sup>-35</sup> )                                                  |                                  |
|    |       |       |   | primase [Bacillus virus Curly]                              | 0.0               | 3.07e-14 (36-87)          | 4.89e <sup>-06</sup> | TraI_TIGR; conjugative transfer relaxase protein TraI (99,94/8e <sup>-25</sup> )                                |                                  |
| 39 | 27860 | 28213 | + | hp                                                          |                   |                           |                      | hp                                                                                                              | hp                               |
| 40 | 28215 | 28553 | + | transcriptional repressor [Bacillus virus Glittering]       | 8e <sup>-70</sup> | DeoR (60-91)              | 7.98e <sup>-05</sup> | Sig70_famx3; RNA polymerase sigma-70 factor, TIGR02954 family, (98,54/3,5e <sup>-7</sup> )                      | RNA polymerase sigma-70 factor   |
|    |       |       |   | transcriptional regulator [Bacillus virus Riggi]            | 1e <sup>-62</sup> | Fis (57-94)               | 5.43e <sup>-03</sup> | SigE-fam_strep; RNA polymerase sigma-70 factor, sigma-E family, (98,47/0,0000013)                               |                                  |
|    |       |       |   | hp                                                          |                   | sigma70-ECF (63-96)       | 5.71e-03             | Sig-70_gvs1; RNA polymerase sigma-70 factor, Rhodopirellula/Verrucomicrobium family (98,39/8,8e <sup>-7</sup> ) |                                  |
| 41 | 28566 | 31655 | + | DNA polymerase III alpha subunit [Bacillus virus Curly]     | 0.0               | dnaE (6-1029)             | 0.0                  | DnaE; DNA polymerase III, alpha subunit (100/6,3e <sup>-171</sup> )                                             | DNA polymerase III alpha subunit |
|    |       |       |   |                                                             |                   | Polc (6-992)              | 0.0                  |                                                                                                                 |                                  |
|    |       |       |   | DNA polymerase III alpha subunit [Bacillus virus Andromeda] | 0.0               | PHP_PolIIIA_DnaE3 (6-285) | 1.37e <sup>-96</sup> | polc; DNA-directed DNA polymerase III (polc) (00/6,3e <sup>-158</sup> )                                         |                                  |
|    |       |       |   |                                                             |                   | DNA_pol3_alpha (299-559)  | 2.00e <sup>-91</sup> |                                                                                                                 |                                  |

|    |       |       |   |                                                                               |             |                          |               |                                                                                                                                                               |                                     |
|----|-------|-------|---|-------------------------------------------------------------------------------|-------------|--------------------------|---------------|---------------------------------------------------------------------------------------------------------------------------------------------------------------|-------------------------------------|
|    |       |       |   | DNA polymerase III<br>alpha subunit<br>[ <i>Bacillus virus</i><br>Andromeda]  | 0.0         | POLIIIAc (9-71)          | $4.76e^{-16}$ | polC_Gram_pos; DNA<br>polymerase III, alpha chain,<br>Gram-positive type (100/4,6e <sup>-124</sup> )                                                          |                                     |
| 42 | 31658 | 32503 | + | UvrD/REP helicase<br>[ <i>Bacillus virus</i> Curly]                           | 0.0         | PDDEXK_1 (10-<br>262)    | $1.94e^{-17}$ | COG2887; RecB family<br>exonuclease (99,96/2,6e <sup>-26</sup> )                                                                                              | RecB family<br>exonuclease          |
|    |       |       |   | PD-(D/E)XK nuclease<br>[ <i>Bacillus virus</i><br>Glittering]                 | 0.0         |                          |               | cas_AF1879; CRISPR-associated<br>protein Cas4/Csa1, subtype I-<br>A/APERN (99,91/9,5e <sup>-22</sup> )                                                        |                                     |
|    |       |       |   | RecB-like protein<br>[ <i>Bacillus</i> phage Leo2]                            | 0.0         | COG2887 (12-178)         | $1.56e^{-05}$ | AddB; ATP-dependent<br>helicase/DNAse subunit B<br>(99,9/4,1e <sup>-21</sup> )                                                                                |                                     |
|    |       |       |   | CRISPR/Cas system<br>associated protein<br>[ <i>Bacillus virus</i> Finn]      | 0.0         |                          |               | rexB_recomb; ATP-dependent<br>nuclease subunit B (99,89/1,1e <sup>-20</sup> )                                                                                 |                                     |
| 43 | 32500 | 33006 | + | endonuclease<br>[ <i>Bacillus</i> phage Leo2]                                 | $6e^{-103}$ | DUF1064 (11-110)         | $5.12e^{-28}$ | c,52,1,16 (A:7-168) TnsA<br>endonuclease, N-terminal domain<br>{ <i>Escherichia coli</i> [TaxId: 562]}<br>(99,47/1,2e <sup>-13</sup> )                        | Endonuclease                        |
|    |       |       |   | Holliday junction<br>resolvase [ <i>Bacillus</i><br>virus Blastoid]           | $1e^{-102}$ |                          |               | Phage_endo_I; Phage<br>endonuclease I (99,09/5,8e <sup>-10</sup> )                                                                                            |                                     |
|    |       |       |   | restriction<br>endonuclease-like<br>protein [ <i>Bacillus</i><br>phage Anath] | $4e^{-31}$  |                          |               | Tn7_Tnp_TnsA_N; TnsA<br>endonuclease N terminal<br>(98,23/0,0000016)                                                                                          |                                     |
| 44 | 33053 | 33733 | + | RNA polymerase<br>sigma-70 factor<br>[ <i>Bacillus virus</i> Curly]           | $7e^{-168}$ | sigma70-ECF (80-<br>220) | $5.01e^{-15}$ | spore_sigmaE; RNA polymerase<br>sigma-E factor (99,95/9,5e <sup>-26</sup> )                                                                                   | RNA<br>polymerase<br>sigma-E factor |
|    |       |       |   | RNA polymerase<br>sigma-70 factor<br>[ <i>Bacillus virus</i><br>Andromeda]    | $1e^{-163}$ | RpoE (77-225)            | $8.44e^{-08}$ | SigW_bacill; RNA polymerase<br>sigma-W factor, This sigma factor<br>is restricted to certain lineages of<br>the order Bacillales (99,94/1,8e <sup>-25</sup> ) |                                     |

|    |       |       |   |                                                                             |             |                        |               |                                                                                                   |                                       |
|----|-------|-------|---|-----------------------------------------------------------------------------|-------------|------------------------|---------------|---------------------------------------------------------------------------------------------------|---------------------------------------|
|    |       |       |   | RNA polymerase sigma-70 factor [ <i>Bacillus virus Eoghan</i> ]             | $6e^{-136}$ | Sigma70_r4 (169-218)   | $8.72e^{-07}$ | RpoE_Sigma70; RNA polymerase sigma factor RpoE (99,94/2,5 $e^{-25}$ )                             |                                       |
| 45 | 33730 | 33981 | + | hp                                                                          |             |                        |               | hp                                                                                                | hp                                    |
| 46 | 33974 | 34255 | + | hp                                                                          |             |                        |               | hp                                                                                                | hp                                    |
| 47 | 34248 | 34481 | + | hp                                                                          |             |                        |               | hp                                                                                                | hp                                    |
| 48 | 34481 | 35191 | + | thymidylate synthase [ <i>Bacillus</i> phage Leo2]                          | $1e^{-169}$ | Thy1 (21-225)          | $1.59e^{-41}$ | d,207,1,1 (A:1-216) Thy1 homologue { <i>Thermotoga maritima</i> [TaxId: 2336]} (100/6 $e^{-36}$ ) | thymidylate synthase                  |
|    |       |       |   | thymidylate synthase [ <i>Bacillus</i> virus Glittering]                    | $2e^{-158}$ | thyX (9-232)           | $2.25e^{-38}$ | thyX; thymidylate synthase, flavin-dependent (100/6,1 $e^{-34}$ )                                 |                                       |
|    |       |       |   | ThyX-like thymidylate synthase [ <i>Streptomyces</i> phage Blueeyedbeauty]  | $3e^{-82}$  | ThyX (6-230)           | $1.36e^{-30}$ | Thy1; Thymidylate synthase complementing protein (100/3,4 $e^{-33}$ )                             |                                       |
| 49 | 35293 | 35439 | + | hp                                                                          |             |                        |               | POTRA_TamA_1; POTRA domain TamA domain 1 (62,95/7,3)                                              | hp                                    |
| 50 | 35453 | 35806 | + | cysteine-rich domain containing protein [ <i>Bacillus</i> virus Glittering] | $2e^{-81}$  | PRK14276 (84-113)      | $2.33e^{-04}$ | DnaJ_C; DnaJ C terminal domain (97,47/0,00098)                                                    | DnaJ domain-containing protein        |
|    |       |       |   | cysteine-rich zinc finger protein [ <i>Bacillus</i> virus Riggi]            | $4e^{-75}$  | COG1107 (80-113)       | $1.23e^{-03}$ | Molecular chaperone (DnaJ superfamily) (97,31/0,0015)                                             |                                       |
|    |       |       |   |                                                                             |             | DnaJ_CXXCXGXG (83-113) | $8.83e^{-03}$ | DnaJ; DnaJ-class molecular chaperone with C-terminal Zn finger domain (97,19/0,0029)              |                                       |
| 51 | 35971 | 36153 | + | hp                                                                          |             |                        |               | FeoB; Fe <sup>2+</sup> transport system protein B (80,91/20)                                      | Prediction lipoprotein signal peptide |
| 52 | 36150 | 36314 | + | hp                                                                          |             |                        |               | hp                                                                                                | hp                                    |
| 53 | 36527 | 36841 | + | hp                                                                          |             |                        |               | hp                                                                                                | hp                                    |

|    |       |       |   |                                                                                     |             |                    |               |                                                                                                                                                  |                |
|----|-------|-------|---|-------------------------------------------------------------------------------------|-------------|--------------------|---------------|--------------------------------------------------------------------------------------------------------------------------------------------------|----------------|
| 54 | 36838 | 37425 | + | deoxynucleoside monophosphate kinase [ <i>Bacillus virus</i> Curly]                 | $2e^{-131}$ |                    |               | Pmev_kin_anim; phosphomevalonate kinase, animal type (99,78/9,5e <sup>-17</sup> )                                                                | kinase         |
|    |       |       |   | phosphate mevalonate kinase [ <i>Bacillus</i> phage Leo2]                           | $9e^{-118}$ |                    |               | c,37,1,17 (A:) Gluconate kinase { <i>Escherichia coli</i> [TaxId: 562]} (99,72/1,5e <sup>-15</sup> )                                             |                |
|    |       |       |   | nucleoside kinase [ <i>Bacillus</i> phage Anath]                                    | $3e^{-34}$  |                    |               | c,37,1,1 (A:3-127,A:159-222) Adenylate kinase {Maize ( <i>Zea mays</i> ) [TaxId: 4577]} (99,7/1e <sup>-15</sup> )                                |                |
|    |       |       |   | P-loop containing nucleoside triphosphate hydrolase [ <i>Listeria</i> phage LP-026] | $5e^{-29}$  |                    |               | c,37,1,1 (A:) Deoxynucleoside monophosphate kinase {Bacteriophage T4 [TaxId: 10665]} (99,7/1,2e <sup>-14</sup> )                                 |                |
| 55 | 37425 | 37769 | + | hp                                                                                  |             |                    |               | Syntaphilin; Golgi-localised syntaxin-1-binding clamp (94,04/0,41)                                                                               | hp             |
|    |       |       |   |                                                                                     |             |                    |               | Golgin_A5; Golgin subfamily A member (5 93,85/2,4)                                                                                               |                |
|    |       |       |   |                                                                                     |             |                    |               | Synaptic vesicle protein EHS-1 and related EH domain proteins (92,19/3,8)                                                                        |                |
| 56 | 37916 | 38725 | + | serine-threonine kinase [ <i>Bacillus virus</i> Andromeda]                          | 0.0         | STKc_CDK9 (60-187) | $2.32e^{-04}$ | d,144,1,7 (A:) Protein kinase C, theta type {Human ( <i>Homo sapiens</i> ) [TaxId: 9606]} (100/1,9e <sup>-33</sup> )                             | protein kinase |
|    |       |       |   | serine-threonine kinase [ <i>Bacillus virus</i> Curly]                              | $1e^{-162}$ | Pkinase (59-187)   | $5.29e^{-03}$ | d,144,1,7 (A:) cAMP-dependent PK, catalytic subunit {Baker's yeast ( <i>Saccharomyces cerevisiae</i> ) [TaxId: 4932]} (100/2,6e <sup>-33</sup> ) |                |
|    |       |       |   | serine-threonine protein kinase [ <i>Bacillus</i> phage Leo2]                       | $2e^{-155}$ |                    |               | d,144,1,7 (E:) cAMP-dependent PK, catalytic subunit {Mouse ( <i>Mus musculus</i> ) [TaxId: 10090]} (100/3,4e <sup>-32</sup> )                    |                |
| 57 | 38716 | 39147 | + | hp                                                                                  |             |                    |               | hp                                                                                                                                               | hp             |

|    |       |       |   |    |  |  |  |                                                                                                                                       |                                          |
|----|-------|-------|---|----|--|--|--|---------------------------------------------------------------------------------------------------------------------------------------|------------------------------------------|
| 58 | 39119 | 39535 | + |    |  |  |  | zf-C2HCIX2C; Zinc-finger<br>(96,99/0,0014)                                                                                            | hp                                       |
|    |       |       |   |    |  |  |  | phage_arpU; phage transcriptional<br>regulator, ArpU family<br>(63,71/6,1)                                                            |                                          |
| 59 | 39532 | 39648 | + | hp |  |  |  | hp                                                                                                                                    | hp                                       |
| 60 | 39650 | 39997 | + | hp |  |  |  | hp                                                                                                                                    | hp                                       |
| 61 | 39997 | 40230 | + | hp |  |  |  | hp                                                                                                                                    | hp                                       |
| 62 | 40232 | 40540 | + | hp |  |  |  | hp                                                                                                                                    | hp                                       |
| 63 | 40540 | 40971 | + |    |  |  |  | CopC; Copper-binding protein<br>CopC (methionine-rich)<br>(98,26/0,00011)                                                             | hp                                       |
|    |       |       |   |    |  |  |  | YifL; Predicted small periplasmic<br>lipoprotein YifL (97,75/0,000078)                                                                |                                          |
|    |       |       |   |    |  |  |  | YifL; Predicted small periplasmic<br>lipoprotein YifL (97,75/0,000078)                                                                |                                          |
|    |       |       |   |    |  |  |  | LPAM_1; Prokaryotic membrane<br>lipoprotein lipid attachment site<br>(97,56/0,00015)                                                  |                                          |
| 64 | 40988 | 41125 | + | hp |  |  |  | hp                                                                                                                                    | hp                                       |
| 65 | 41227 | 41610 | + | hp |  |  |  | DUF2582; Winged helix-turn-<br>helix domain (DUF2582)<br>(98,65/8,9e <sup>-7</sup> )                                                  | putative<br>transcriptional<br>regulator |
|    |       |       |   |    |  |  |  | COG2865; Predicted<br>transcriptional regulator, contains<br>HTH domain (98,55/0,0000018)                                             |                                          |
|    |       |       |   |    |  |  |  | a,4,5,60 (A:86-162) Segregation<br>and condensation protein B, ScpB<br>{ <i>Chlorobium tepidum</i> [TaxId:<br>1097]} (98,41/0,000015) |                                          |

|    |       |       |   |                                                                                    |            |                            |               |                                                                                                                                  |                                        |
|----|-------|-------|---|------------------------------------------------------------------------------------|------------|----------------------------|---------------|----------------------------------------------------------------------------------------------------------------------------------|----------------------------------------|
|    |       |       |   |                                                                                    |            |                            |               | PaaX; PaaX-like protein<br>(98,17/0,000048)                                                                                      |                                        |
|    |       |       |   |                                                                                    |            |                            |               | a,4,5,2 (A:2-72) LexA repressor,<br>N-terminal DNA-binding domain<br>{ <i>Escherichia coli</i> [TaxId: 562]}<br>(98,15/0,000088) |                                        |
|    |       |       |   |                                                                                    |            |                            |               | a,4,5,39 (A:) Penicillinase<br>repressor BlaI { <i>Bacillus<br/>licheniformis</i> [TaxId: 1402]}<br>(98,14/0,00011)              |                                        |
| 66 | 41612 | 42037 | + | hp                                                                                 |            |                            |               | hp                                                                                                                               | hp                                     |
| 67 | 42255 | 43544 | + | FtsK/SpoIIIE ATPase<br>[ <i>Bacillus virus</i> Curly]                              | 0.0        | FtsK (190-388)             | $2.23e^{-22}$ | T7SS_EccC_a; type VII secretion<br>protein EccCa (99,86/9e <sup>-20</sup> )                                                      | FtsK/SpoIIIE<br>family protein         |
|    |       |       |   | FtsK/SpoIIIE family<br>protein [ <i>Bacillus virus</i><br>Riggi]                   | 0.0        | PRK10263 (182-<br>379)     | $4.25e^{-13}$ | FtsK; DNA segregation ATPase<br>FtsK/SpoIIIE and related proteins<br>(99,76/1,8e <sup>-16</sup> )                                |                                        |
|    |       |       |   | FtsK-like DNA<br>translocase [ <i>Bacillus</i><br>phage 019DV002]                  | 0.0        | T7_EssCb_Firm<br>(163-389) | $8.33e^{-10}$ | PvdE; ABC-type siderophore<br>export system, fused ATPase and<br>permease components (98,69/6,4e <sup>-9</sup> )                 |                                        |
| 68 | 43807 | 44082 | + | replication/relaxation<br>protein [ <i>Bacillus virus</i><br>Curly]                | $5e^{-63}$ |                            |               | Replic_Relax; Replication-<br>relaxation (98,96/3,8e <sup>-9</sup> )                                                             | Replic_Relax<br>superfamily<br>protein |
|    |       |       |   | plasmid replication-<br>relaxation protein<br>[ <i>Bacillus virus</i> Riggi]       | $1e^{-60}$ |                            |               | DpnII; DpnII restriction<br>endonuclease (93,27/1,1)                                                                             |                                        |
|    |       |       |   | plasmid replication-<br>relaxation protein<br>[ <i>Bacillus virus</i><br>Blastoid] | $1e^{-60}$ |                            |               | capSnatchArena; RNA<br>endonuclease, cap-snatching,<br>arenavirus family (92,65/0,69)                                            |                                        |

|    |       |       |   |                                                                        |                                                                                                |                                                                                               |                      |                                                                                                   |                            |
|----|-------|-------|---|------------------------------------------------------------------------|------------------------------------------------------------------------------------------------|-----------------------------------------------------------------------------------------------|----------------------|---------------------------------------------------------------------------------------------------|----------------------------|
| 69 | 44095 | 44508 | + | hp                                                                     |                                                                                                |                                                                                               |                      | TrbC; TrbC/VIRB2 family (98,95/1,6e <sup>-8</sup> )                                               | TrbC/VIRB2 family protein  |
|    |       |       |   |                                                                        |                                                                                                |                                                                                               |                      | VirB2; Type IV secretory pathway (98,47/0,0000064)                                                |                            |
|    |       |       |   |                                                                        |                                                                                                |                                                                                               |                      | conj_TIGR03745; integrating conjugative element membrane protein, PFL_4702 family (98,17/0,00014) |                            |
|    |       |       |   |                                                                        |                                                                                                |                                                                                               |                      | Maff2; Maff2 family (97,51/0,0036)                                                                |                            |
| 70 | 44579 | 44782 | + | DNA binding domain protein [ <i>Bacillus</i> phage 019DV002]           | 6e <sup>-25</sup>                                                                              | gatA (22-43)                                                                                  | 6.87e <sup>-03</sup> | Arc; Arc-like DNA binding domain (96,23/0,033)                                                    | DNA binding domain protein |
|    |       |       |   | hp                                                                     | antidote_CC2985; putative addiction module antidote protein, CC2985 family (95,93/0,045)       |                                                                                               |                      |                                                                                                   |                            |
|    |       |       |   |                                                                        | COG4710; Predicted DNA-binding protein with an HTH domain 95,88/0,12                           |                                                                                               |                      |                                                                                                   |                            |
|    |       |       |   |                                                                        | a,43,1,1 (A:) Arc repressor { <i>Salmonella</i> bacteriophage P22 [TaxId: 10754]} (94,95/0,16) |                                                                                               |                      |                                                                                                   |                            |
| 71 | 45289 | 44801 | - | hp                                                                     |                                                                                                |                                                                                               |                      | hp                                                                                                | hp                         |
| 72 | 46030 | 45437 | - | DNA polymerase III epsilon subunit [ <i>Bacillus</i> virus Curly]      | 8e <sup>-142</sup>                                                                             | DEDDh (4-157)                                                                                 | 3.95e <sup>-37</sup> | PolC; DNA polymerase III, alpha subunit (gram-positive type) (99,87/6,4e <sup>-20</sup> )         | DEDDh exonuclease          |
|    |       |       |   | EXOIII (1-162)                                                         | 8.53e <sup>-26</sup>                                                                           |                                                                                               |                      |                                                                                                   |                            |
|    |       |       |   | DNA polymerase III epsilon subunit [ <i>Bacillus</i> virus Glittering] | 2e <sup>-137</sup>                                                                             | DnaQ (1-162)                                                                                  | 9.01e <sup>-26</sup> | dnaQ_proteo; DNA polymerase III, epsilon subunit, Proteobacterial (99,85/7,1e <sup>-19</sup> )    |                            |
|    |       |       |   | DEDDh 3'-5' exonuclease [ <i>Paenibacillus</i> phage Scottie]          | 3e <sup>-35</sup>                                                                              | RNase_T (4-156)                                                                               | 5.32e <sup>-25</sup> |                                                                                                   |                            |
|    |       |       |   | polC_Gram_pos (2-167)                                                  | 3.02e <sup>-24</sup>                                                                           | dinG_rel; DnaQ family exonuclease/DinG family helicase, putative (99,82/7,1e <sup>-18</sup> ) |                      |                                                                                                   |                            |
| 73 | 46767 | 46030 | - | peptidase [ <i>Bacillus</i>                                            | 2e <sup>-50</sup>                                                                              |                                                                                               |                      | ImmA; Zn-dependent peptidase                                                                      | peptidase                  |



|    |       |       |   |                                                                  |                    |                       |                      |                                                                                                                            |                             |
|----|-------|-------|---|------------------------------------------------------------------|--------------------|-----------------------|----------------------|----------------------------------------------------------------------------------------------------------------------------|-----------------------------|
|    |       |       |   | phage Leo2]                                                      |                    |                       |                      | ImmA, M78 family (98,82/7,8e <sup>-8</sup> )                                                                               |                             |
|    |       |       |   |                                                                  |                    |                       |                      | Peptidase_M78; IrrE N-terminal-like domain (98,69/2,3e <sup>-7</sup> )                                                     |                             |
|    |       |       |   | zinc-dependent metalloprotease [ <i>Bacillus</i> virus Blastoid] | 9e <sup>-49</sup>  |                       |                      | COG3800; Predicted transcriptional regulator (98,39/0,0000038)                                                             |                             |
|    |       |       |   |                                                                  |                    |                       |                      | MPTase-PolyVal; Metallopeptidase superfamily domain (98,05/0,000016)                                                       |                             |
| 74 | 46995 | 46768 | - |                                                                  |                    |                       |                      | SlyX; SlyX (92,79/1,4)                                                                                                     | hp                          |
|    |       |       |   |                                                                  |                    |                       |                      | GTPase-activating protein 92,01/2,1                                                                                        |                             |
|    |       |       |   |                                                                  |                    |                       |                      | SlyX; Uncharacterized coiled-coil protein SlyX (sensitive to lysis X) (89,6/3,7)                                           |                             |
| 75 | 47355 | 47837 | + | Holliday junction resolvase [ <i>Bacillus</i> virus Glittering]  | 5e <sup>-111</sup> | PHA00159 (58-129)     | 4.46e <sup>-06</sup> | c,52,1,17 (A:) Endonuclease I (Holliday junction resolvase) {Bacteriophage T7 [TaxId: 10760]} (99,43/1,8e <sup>-12</sup> ) | holliday junction resolvase |
|    |       |       |   | T7-like endonuclease [ <i>Bacillus</i> virus Curly]              | 2e <sup>-110</sup> | Phage_endo_I (58-129) | 8.84e <sup>-04</sup> | Phage_endo_I; Phage endonuclease I (98,73/1,4e <sup>-7</sup> )                                                             |                             |
|    |       |       |   | endonuclease [ <i>Bacillus</i> phage Leo2]                       | 7e <sup>-109</sup> |                       |                      | Vsr; DNA mismatch endonuclease Vsr (98,08/0,000012)                                                                        |                             |
| 76 | 47884 | 48045 | + | hp                                                               |                    |                       |                      | hp                                                                                                                         | hp                          |
| 77 | 48046 | 48210 | + | hp                                                               |                    |                       |                      | FlaG; Uncharacterized conserved protein, FlaG/YvyC family (99,76/4,3e <sup>-18</sup> )                                     | FlaG/YvyC family protein    |
|    |       |       |   |                                                                  |                    |                       |                      | d,352,1,1 (A:2-109) Hypothetical protein YvyC { <i>Bacillus subtilis</i> [TaxId: 1423]} (99,76/3,7e <sup>-18</sup> )       |                             |
|    |       |       |   |                                                                  |                    |                       |                      | FlaG; FlaG protein 99,74/7,6e <sup>-18</sup>                                                                               |                             |
| 78 | 48210 | 48377 | + | hp                                                               |                    | nifE (5-42)           | 9.38e <sup>-03</sup> | e,3,1,1 (A:328-668) Penicillin binding protein 2a (PBP2A), C-terminal domain { <i>Staphylococcus</i>                       | hp                          |

|    |       |       |   |                                                                              |            |  |  |                                                                                                                                                                            |                                        |
|----|-------|-------|---|------------------------------------------------------------------------------|------------|--|--|----------------------------------------------------------------------------------------------------------------------------------------------------------------------------|----------------------------------------|
|    |       |       |   |                                                                              |            |  |  | <i>aureus</i> [TaxId: 1280]}<br>(90,99/0,53)                                                                                                                               |                                        |
|    |       |       |   |                                                                              |            |  |  | Activator-TraM; Transcriptional<br>activator TraM (89,76/0,3)                                                                                                              |                                        |
|    |       |       |   |                                                                              |            |  |  | XisI; XisI protein (88,95/1,5)                                                                                                                                             |                                        |
|    |       |       |   |                                                                              |            |  |  | bioW; 6-carboxyhexanoate--CoA<br>ligase, Alternate name: pimeloyl-<br>CoA synthase, [Biosynthesis of<br>cofactors, prosthetic groups, and<br>carriers, Biotin] (87,93/1,2) |                                        |
| 79 | 48402 | 48554 | + | hp                                                                           |            |  |  | Transcription factor (contains Zn<br>finger) (97,82/0,0000046)                                                                                                             | putative<br>transcription<br>factor    |
|    |       |       |   |                                                                              |            |  |  | CpXC; CpXC protein<br>(97,57/0,00023)                                                                                                                                      |                                        |
|    |       |       |   |                                                                              |            |  |  | Transcription factor BLIMP-<br>1/PRDI-BF1, contains C2H2-type<br>Zn-finger and SET domains<br>(97,45/0,000092)                                                             |                                        |
|    |       |       |   |                                                                              |            |  |  | Transcriptional repressor SALM<br>(97,4/0,0000058)                                                                                                                         |                                        |
| 80 | 48556 | 48702 | + | hp                                                                           |            |  |  | hp                                                                                                                                                                         | hp                                     |
| 81 | 48896 | 49570 | + | putative terminase<br>small subunit<br>[ <i>Bacillus</i> phage<br>056SW001B] | $1e^{-77}$ |  |  | sm_term_P27; phage terminase,<br>small subunit, putative, P27<br>family (89,28/3,6)                                                                                        | putative<br>terminase small<br>subunit |
|    |       |       |   | putative terminase<br>small subunit<br>[ <i>Bacillus</i> phage<br>019DV002]  | $6e^{-76}$ |  |  | Terminase_4; Phage terminase,<br>small subunit (88,04/5,6)                                                                                                                 |                                        |
|    |       |       |   | putative terminase<br>small subunit<br>[ <i>Bacillus</i> phage<br>276BB001]  | $6e^{-76}$ |  |  | COG3747; Phage terminase, small<br>(86,89/9,2)                                                                                                                             |                                        |
|    |       |       |   | exopolyphosphatase<br>domain protein                                         | $3e^{-64}$ |  |  |                                                                                                                                                                            |                                        |

|  |  |  |  |                                     |  |  |  |  |  |
|--|--|--|--|-------------------------------------|--|--|--|--|--|
|  |  |  |  | [ <i>Geobacillus</i> phage<br>GBK1] |  |  |  |  |  |
|--|--|--|--|-------------------------------------|--|--|--|--|--|

Table S2. Annotation of the Bacillus phage Novomoskovsk

| ORF№ | Start codon | Stop codon | Strand | Blast results                                                       |                   | Conserved domains, Blast |       | Hhpred results                                                                                                                                                                                                               | Annotation               |
|------|-------------|------------|--------|---------------------------------------------------------------------|-------------------|--------------------------|-------|------------------------------------------------------------------------------------------------------------------------------------------------------------------------------------------------------------------------------|--------------------------|
|      |             |            |        | Name                                                                | E-val             | Name, (region)           | E-val | (Prob./E-val)                                                                                                                                                                                                                |                          |
| 1    | 65          | 739        | +      | Putative terminase small subunit [ <i>Bacillus phage</i> 056SW001B] | 1e <sup>-73</sup> |                          |       | sm_term_P27; phage terminase, small subunit, putative, P27 family, 92,77/0,94                                                                                                                                                | Terminase, small subunit |
|      |             |            |        |                                                                     |                   |                          |       | Terminase_4; Phage terminase, small subunit (91,46/2)                                                                                                                                                                        |                          |
|      |             |            |        |                                                                     |                   |                          |       | COG3747; Phage terminase, small subunit (90,62/2,5)                                                                                                                                                                          |                          |
| 2    | 1292        | 1074       | -      | hp                                                                  |                   |                          |       |                                                                                                                                                                                                                              | hp                       |
| 3    | 1756        | 1457       | -      | hp                                                                  |                   |                          |       | g,37,1,1 (A:67-101) Zinc finger protein 295, ZNF295 (95,4/0,0066)                                                                                                                                                            | hp                       |
| 4    | 2006        | 1749       | -      | hp                                                                  |                   |                          |       |                                                                                                                                                                                                                              | hp                       |
| 5    | 2189        | 2031       | -      | hp                                                                  |                   |                          |       | FixS; Cytochrome oxidase maturation protein cbb3-type (77,84/8,2)                                                                                                                                                            | hp                       |
|      |             |            |        |                                                                     |                   |                          |       | ccoS; cytochrome oxidase maturation protein, cbb3-type, CcoS from Rhodobacter capsulatus has been shown essential for incorporation of redox-active prosthetic groups (heme, Cu) into cytochrome cbb (3) oxidase, (76,32/10) |                          |
|      |             |            |        |                                                                     |                   |                          |       | CD225; Interferon-induced transmembrane protein                                                                                                                                                                              |                          |

|    |      |      |   |                                                                 |     |                        |                       |                                                                                                                                         |                          |
|----|------|------|---|-----------------------------------------------------------------|-----|------------------------|-----------------------|-----------------------------------------------------------------------------------------------------------------------------------------|--------------------------|
|    |      |      |   |                                                                 |     |                        |                       | (72,77/6,3)                                                                                                                             |                          |
|    |      |      |   |                                                                 |     |                        |                       | FixS; Cytochrome oxidase maturation protein, CcoS/FixS family [Posttranslational modification, protein turnover, chaperones] (75,87/11) |                          |
| 6  | 2407 | 2195 | - | hp                                                              |     |                        |                       |                                                                                                                                         | hp                       |
| 7  | 2700 | 2404 | - | hp                                                              |     |                        |                       |                                                                                                                                         | hp                       |
| 8  | 3089 | 2832 | - | hp                                                              |     |                        |                       |                                                                                                                                         | hp                       |
| 9  | 3318 | 3091 | - | hp                                                              |     |                        |                       |                                                                                                                                         | hp                       |
| 10 | 3419 | 5104 | + | Terminase [ <i>Bacillus virus Finn</i> ]                        | 0.0 | Terminase_GpA (52-314) | $1.14 \cdot 10^{-5}$  | Terminase_GpA; Phage terminase large subunit (GpA) (100/1,5e <sup>-31</sup> )                                                           | Terminase, large subunit |
|    |      |      |   |                                                                 |     |                        |                       | Terminase_1; Phage Terminase (100/1,2e <sup>-31</sup> )                                                                                 |                          |
|    |      |      |   |                                                                 |     |                        |                       | COG5323; Large terminase phage packaging protein (100/3e <sup>-30</sup> )                                                               |                          |
| 11 | 5187 | 6506 | + | Portal [ <i>Bacillus virus Riggi</i> ]                          | 0.0 | DUF935 (90-394)        | $4.54 \cdot 10^{-21}$ | gp29; Mu-like prophage protein gp29 100/4e <sup>-31</sup>                                                                               | Portal protein           |
|    |      |      |   | Portal protein [ <i>Bacillus virus Glittering</i> ]             | 0.0 |                        |                       | portal_HK97; phage portal protein, HK97 family, (99,97/6,6e <sup>-28</sup> )                                                            |                          |
|    |      |      |   | Portal protein [ <i>Bacillus virus Curly</i> ]                  | 0.0 | gp29 (93-397)          | $4.56 \cdot 10^{-8}$  | BeeE; Phage portal protein BeeE (99,96/4,1e <sup>-28</sup> )                                                                            |                          |
|    |      |      |   | Portal protein [ <i>Bacillus virus Blastoid</i> ]               | 0.0 |                        |                       | Phage_portal; Phage portal protein (99,96/1,5e <sup>-27</sup> )                                                                         |                          |
| 12 | 6560 | 7462 | + | Phage head morphogenesis protein [ <i>Bacillus virus Finn</i> ] | 0.0 | Phage_Mu_F (144-254)   | $8.39 \cdot 10^{-15}$ | phageSPP1_gp7; phage putative head morphogenesis protein, SPP1 gp7 family, (99,85/2,3e <sup>-20</sup> )                                 | Minor head protein       |
|    |      |      |   | Minor head protein                                              | 0.0 | PhageSPP1_gp7          | $3.60 \cdot 10^{-14}$ | Phage_min_cap2; Phage minor                                                                                                             |                          |

|    |      |      |   |                                                              |                    |                  |                       |                                                                                                                                                         |                                            |
|----|------|------|---|--------------------------------------------------------------|--------------------|------------------|-----------------------|---------------------------------------------------------------------------------------------------------------------------------------------------------|--------------------------------------------|
|    |      |      |   | [ <i>Bacillus</i> virus Riggi]                               |                    | (151-261)        |                       | capsid protein 2 (99,84/4,3e <sup>-19</sup> )                                                                                                           |                                            |
|    |      |      |   | Minor head protein<br>[ <i>Bacillus</i> phage Leo2]          | 0.0                | COG2369 (19-264) | 2.12·10 <sup>-3</sup> | Phage_Mu_F; Phage Mu protein F like protein (99,81/1e <sup>-18</sup> )                                                                                  |                                            |
| 13 | 7977 | 7495 | - | hp                                                           |                    |                  |                       | YifL; Predicted small periplasmic lipoprotein YifL (98,17/9,2e <sup>-6</sup> )                                                                          | Putative signal peptide-containing protein |
|    |      |      |   |                                                              |                    |                  |                       | COG5510; Predicted small secreted protein (97,12/0,001)                                                                                                 |                                            |
| 14 | 8096 | 7977 | - | Ribonuclease<br>[ <i>Bacillus</i> phage Leo2]                | 3e <sup>-13</sup>  |                  |                       |                                                                                                                                                         |                                            |
|    |      |      |   | Hypothetical protein Riggi_14 [ <i>Bacillus</i> virus Riggi] | 6e <sup>-15</sup>  |                  |                       |                                                                                                                                                         | hp                                         |
| 15 | 8516 | 9352 | + | Scaffold protein<br>[ <i>Bacillus</i> virus Finn]            | 2e <sup>-175</sup> |                  |                       | Mu-like_Pro; Mu-like prophage I protein (99,9/1,4e <sup>-21</sup> )                                                                                     |                                            |
|    |      |      |   | Scaffold protein<br>[ <i>Bacillus</i> virus Riggi]           | 1e <sup>-172</sup> |                  |                       | COG4388; Mu-like prophage I protein [Mobilome: prophages, transposons], (99,87/1,8e <sup>-20</sup> )                                                    |                                            |
|    |      |      |   | Scaffold protein<br>[ <i>Bacillus</i> virus Curly]           | 8e <sup>-170</sup> |                  |                       | Phage_GPO; Phage capsid scaffolding protein (GPO) serine peptidase (99,52/1,6e <sup>-13</sup> )                                                         |                                            |
|    |      |      |   | Putative protease I<br>[Prokaryotic dsDNA virus sp.]         | 2e <sup>-4</sup>   |                  |                       | proheadase_HK97; phage prohead protease, HK97 family, This model describes the prohead protease of HK97 and related phage, (99,32/8,4e <sup>-11</sup> ) | Prohead protease                           |
|    |      |      |   |                                                              |                    |                  |                       | COG3740; Phage head maturation protease [Mobilome: prophages, transposons], (99,15/2,6e <sup>-9</sup> )                                                 |                                            |

|    |       |       |   |                                                          |     |                |                       |                                                                                                       |                                   |
|----|-------|-------|---|----------------------------------------------------------|-----|----------------|-----------------------|-------------------------------------------------------------------------------------------------------|-----------------------------------|
| 16 | 9373  | 9795  | + | hp                                                       |     |                |                       | COG5471; Predicted phage recombinase, RecA/RadA family (99,75/1,1e <sup>-16</sup> )                   | DUF2190 domain-containing protein |
|    |       |       |   |                                                          |     |                |                       | DUF2190 (99,49/2,8·10 <sup>-12</sup> )                                                                |                                   |
| 17 | 9814  | 10707 | + | Major capsid protein [ <i>Bacillus</i> phage Leo2]       | 0.0 |                |                       | Major capsid protein gp5 {Bacteriophage} HK97 (99,95/3,3e <sup>-26</sup> )                            | Major capsid protein              |
|    |       |       |   | Major capsid protein [ <i>Bacillus</i> virus Glittering] | 0.0 |                |                       | major_cap_HK97; phage major capsid protein, HK97 family, (99,93/3e <sup>-23</sup> )                   |                                   |
|    |       |       |   | Major capsid protein [ <i>Bacillus</i> virus Riggi]      | 0.0 |                |                       | Phage_capsid; Phage capsid family (99,9/5,3e <sup>-23</sup> )                                         |                                   |
| 18 | 10726 | 10995 | + | hp                                                       |     |                |                       | Rep-A_N; Replication factor-A protein 1, N-terminal domain (47,48/25)                                 | hp                                |
| 19 | 11070 | 11291 | + | hp                                                       |     |                |                       | Ribosomal_L9_N; Ribosomal protein L9, N-terminal domain (94,28/0,068)                                 | hp                                |
|    |       |       |   |                                                          |     |                |                       | d,100,1,1 (A:1-52) Ribosomal protein L9 N-domain { <i>Bacillus stearothermophilus</i> } (94,03/0,095) |                                   |
|    |       |       |   |                                                          |     |                |                       | Packaging_FI; DNA packaging protein FI (92,83/0,29)                                                   |                                   |
| 20 | 11305 | 11697 | + | hp                                                       |     | DUF1320 (2-65) | 2.18·10 <sup>-5</sup> | gp436; Mu-like prophage protein gp36 (99,83/4,3e <sup>-19</sup> )                                     | head completion protein           |
|    |       |       |   |                                                          |     | gp436 (2-74)   | 2.98·10 <sup>-3</sup> | Phage_connect_1; Phage gp6-like head-tail connector protein (98,58/0,0000011 <sup>1</sup> )           |                                   |

|    |       |       |   |                                                                         |            |  |  |                                                                                                                                                                                                                                                                              |                         |
|----|-------|-------|---|-------------------------------------------------------------------------|------------|--|--|------------------------------------------------------------------------------------------------------------------------------------------------------------------------------------------------------------------------------------------------------------------------------|-------------------------|
| 21 | 11886 | 11767 | - | hp                                                                      |            |  |  |                                                                                                                                                                                                                                                                              | hp                      |
| 22 | 12029 | 12145 | + | Virion morphogenesis protein [ <i>Bacillus phage</i> Leo2]              | $3e^{-20}$ |  |  | COG5005; Mu-like prophage protein gpG [Mobilome: prophages, transposons], (98,95/3,8e <sup>-9</sup> )                                                                                                                                                                        | tail completion protein |
|    |       |       |   | Tail completion and head joining protein [ <i>Bacillus virus</i> Riggi] | $9e^{-9}$  |  |  | Phage_tail_S; Phage virion morphogenesis family (98,91/9e <sup>-10</sup> )                                                                                                                                                                                                   |                         |
|    |       |       |   | Head-to-tail stopper [ <i>Bacillus phage</i> 276BB001]                  | $3e^{-6}$  |  |  | Tail_comp_S; phage virion morphogenesis (putative tail completion) protein, This model describes protein S of phage P2, suggested experimentally to act in tail completion and stable head joining, and related proteins from a number of phage, (98,65/3,7e <sup>-8</sup> ) |                         |
|    |       |       |   | Tail completion protein [ <i>Bacillus virus</i> Blastoid]               | $5e^{-8}$  |  |  | Phge_HK97_gp10; phage protein, HK97 gp10 family, This model represents an uncharacterized, highly divergent bacteriophage family (98,63/7,2e <sup>-8</sup> )                                                                                                                 |                         |
| 23 | 12142 | 12576 | + | hp                                                                      |            |  |  | Phage_tail_U; Phage minor tail protein U (99,57/1,3e <sup>-13</sup> )                                                                                                                                                                                                        | tail terminator protein |
| 24 | 12588 | 12764 | + | hp                                                                      |            |  |  | Predicted translation initiation factor related to eIF-1A [Translation, ribosomal structure and biogenesis] (72,07/13)                                                                                                                                                       | hp                      |
|    |       |       |   |                                                                         |            |  |  | eIF-1A; eukaryotic/archaeal initiation factor 1A, Recommended nomenclature: eIF-1A for eukaryotes, aIF-1A for Archaea (70,11/20)                                                                                                                                             |                         |



|    |       |       |   |                                                         |                    |                           |                      |                                                                                                                   |                         |
|----|-------|-------|---|---------------------------------------------------------|--------------------|---------------------------|----------------------|-------------------------------------------------------------------------------------------------------------------|-------------------------|
|    |       |       |   |                                                         |                    |                           |                      | b,40,4,5 (A:) Archaeal initiation factor-1a, aIF1a<br>{ <i>Methanococcus jannaschii</i> [TaxId: 2190]} (67,47/21) |                         |
| 25 | 12764 | 13702 | + | Major tail protein<br>[ <i>Bacillus</i> phage 019DV002] | 3e <sup>-104</sup> |                           |                      | Phage tail tube protein<br>98,54/0,000012                                                                         | Tail tube protein       |
|    |       |       |   | Major tail protein<br>[ <i>Bacillus</i> phage 276BB001] | 4e <sup>-104</sup> |                           |                      | Phage-like element PBSX protein XkdM { <i>Bacillus subtilis</i> 98,35/0,000046                                    |                         |
|    |       |       |   |                                                         |                    |                           |                      | Phage_tail_2; Phage tail tube protein 9(5,08/1,1)                                                                 |                         |
| 26 | 13727 | 14068 | + | hp                                                      |                    |                           |                      | Phage_TAC_4; Phage tail assembly chaperone (98,52/0,0000022)                                                      | Tail assembly chaperone |
|    |       |       |   |                                                         |                    |                           |                      | Phage_TAC_1; Phage tail assembly chaperone 98,37/0,000009                                                         |                         |
|    |       |       |   |                                                         |                    |                           |                      | Phage_TAC_5; Phage XkdN-like tail assembly chaperone protein, TAC (87,48/4,1)                                     |                         |
| 27 | 14113 | 14319 | + | hp                                                      |                    |                           |                      |                                                                                                                   | hp                      |
| 28 | 14323 | 16641 | + | Tape measure protein<br>[ <i>Bacillus</i> virus Eoghan] | 0.0                | HI1514 (62-292)           | 6.47e <sup>-26</sup> | COG5412; Phage-related protein (99,78/2,3e <sup>-12</sup> )                                                       | Tape measure protein    |
|    |       |       |   | Tape measure protein<br>[ <i>Bacillus</i> virus Taylor] | 0.0                | tape_meas_nterm (129-203) | 1.29e <sup>-16</sup> | HI1514; Phage tail tape-measure protein, controls tail length (99,11/0,0000036)                                   |                         |
|    |       |       |   | Tape measure protein<br>[ <i>Bacillus</i> phage Leo2]   | 0.0                | COG5412 (153-666)         | 4.42e <sup>-12</sup> |                                                                                                                   |                         |
|    |       |       |   | Tape measure protein<br>[ <i>Bacillus</i> virus Curly]  | 0.0                | PHA01351 (462-596)        | 2.73e <sup>-4</sup>  |                                                                                                                   |                         |
| 29 | 16655 | 19150 | + | Tail fiber [ <i>Bacillus</i> virus Blastoid]            | 0.0                |                           |                      | Receptor mediating netrin-dependent axon guidance (99,94/7,3e <sup>-23</sup> )                                    | Putative tail protein   |
|    |       |       |   | Tail fiber [ <i>Bacillus</i>                            | 0.0                |                           |                      | FN3; Fibronectin type 3 domain                                                                                    |                         |

|    |       |       |   |                                                                                |                    |                               |                      |                                                                                                                                                          |                                                    |
|----|-------|-------|---|--------------------------------------------------------------------------------|--------------------|-------------------------------|----------------------|----------------------------------------------------------------------------------------------------------------------------------------------------------|----------------------------------------------------|
|    |       |       |   | phage Leo2]                                                                    |                    |                               |                      | (99,8/6,1e <sup>-16</sup> )                                                                                                                              |                                                    |
|    |       |       |   | Minor tail protein<br>[ <i>Bacillus</i> phage<br>276BB001]                     | 0.0                |                               |                      | Neural cell adhesion molecule<br>L1 (99,74/1,6e <sup>-15</sup> )                                                                                         |                                                    |
|    |       |       |   |                                                                                |                    |                               |                      | Peripheral benzodiazepine<br>receptor PRAX-1 99,68/(1,6e <sup>-3</sup> )                                                                                 |                                                    |
|    |       |       |   |                                                                                |                    |                               |                      | Adhesion-type protein<br>(99,61/2,1e <sup>-13</sup> )                                                                                                    |                                                    |
| 30 | 19155 | 19454 | + | Minor tail protein<br>[ <i>Bacillus</i> phage<br>019DV002]                     | 4e <sup>-28</sup>  |                               |                      |                                                                                                                                                          | hp                                                 |
| 31 | 19454 | 21085 | + | Putative tailspike,<br>beta-helical glycoside<br>[ <i>Bacillus</i> virus Finn] | 0.0                | Beta_helix (370-<br>524)      | 3.48e <sup>-12</sup> | phage_tailspike_middle; N-<br>terminal and middle domains of<br>tailspike protein in<br><i>Acinrtobacter</i> bacteriophages<br>(99,23/3e <sup>-8</sup> ) | Putative tailspike                                 |
|    |       |       |   | Tailspike [ <i>Bacillus</i><br>virus Riggi]                                    | 0.0                | NosD_copper_f<br>am (252-497) | 5.79e <sup>-7</sup>  |                                                                                                                                                          |                                                    |
|    |       |       |   | Tailspike [ <i>Bacillus</i><br>virus Blastoid]                                 | 0.0                | NosD (264-425)                | 6.25e <sup>-3</sup>  |                                                                                                                                                          |                                                    |
| 32 | 21100 | 22050 | + | Minor tail protein<br>[ <i>Bacillus</i> phage<br>019DV002]                     | 6e <sup>-148</sup> |                               |                      | COG4379 Mu-like prophage tail<br>protein gpP (99,96/5,7e <sup>-25</sup> )                                                                                | Baseplate hub<br>protein and<br>central tail fiber |
|    |       |       |   | Minor tail protein<br>[ <i>Bacillus</i> phage<br>276BB001]                     | 3e <sup>-147</sup> |                               |                      | COG3501 VgrG 99,93/1,3e <sup>-22</sup>                                                                                                                   |                                                    |
|    |       |       |   | Minor tail protein<br>[ <i>Streptomyces</i> phage<br>Zuko]                     | 7e <sup>-45</sup>  |                               |                      | Prophage_tail; Prophage<br>endopeptidase tail (99,84/6,4e <sup>-19</sup> )                                                                               |                                                    |

|    |       |       |   |                                                                                     |             |                      |               |                                                                                                                                                                    |                                    |
|----|-------|-------|---|-------------------------------------------------------------------------------------|-------------|----------------------|---------------|--------------------------------------------------------------------------------------------------------------------------------------------------------------------|------------------------------------|
| 33 | 22047 | 22640 | + | Collagen triple helix repeat containing protein [ <i>Bacillus</i> phage vB_BpsS-36] | $7e^{-110}$ |                      |               | b,21,1,3 (A:162-264) receptor binding protein, rbp, C-terminal domain { <i>Lactococcus lactis</i> } phage p2 (96,75/0,031)                                         | Receptor-binding protein           |
|    |       |       |   |                                                                                     |             |                      |               | Caudo_bapla_RBP; Receptor-binding protein of phage tail base-plate <i>Siphoviridae</i> , head (87,3/12)                                                            |                                    |
| 34 | 22657 | 23073 | + | Phosphodiesterase [ <i>Bacillus</i> virus Riggi]                                    | $1e^{-90}$  | PRK12704 (13-136)    | $4.23e^{-5}$  | RNase_Y; ribonuclease Y (98,98 \, 1,3e <sup>-7</sup> )                                                                                                             | putative holin                     |
|    |       |       |   | Transposase [ <i>Bacillus</i> phage Leo2]                                           | $1e^{-87}$  | RNase_Y (15-136)     | $3.32e^{-3}$  | Holin_BhlA; BhlA holin family (98,94/3,8e <sup>-8</sup> )                                                                                                          |                                    |
|    |       |       |   | Phosphodiesterase [ <i>Bacillus</i> virus Blastoid]                                 | $8e^{-81}$  | IATP (37-80)         | $5.87e^{-3}$  | AtpF; FoF1-type ATP synthase, membrane subunit b or b' (97,38/0,024)                                                                                               |                                    |
| 35 | 23087 | 23986 | + | Cell wall hydrolase/autolysin [ <i>Bacillus</i> virus Eoghan]                       | 0.0         | MurNAc-LAA (3-180)   | $1.88e^{-65}$ | c,56,5,6 (A:) N-acetylmuramoyl-L-alanine amidase CwlV { <i>Paenibacillus polymyxa</i> } (99,97/2,2e <sup>-28</sup> )                                               | N-acetylmuramoyl-L-alanine amidase |
|    |       |       |   |                                                                                     |             | Amidase_3 (4-179)    | $2.17e^{-57}$ |                                                                                                                                                                    |                                    |
|    |       |       |   |                                                                                     |             | mltD (200-296)       | $1.94e^{-21}$ |                                                                                                                                                                    |                                    |
|    |       |       |   |                                                                                     |             | LysM (209-251)       | $1.68e^{-15}$ |                                                                                                                                                                    |                                    |
|    |       |       |   |                                                                                     |             | spore_safA (211-250) | $5.15e^{-4}$  |                                                                                                                                                                    |                                    |
| 36 | 24072 | 24281 | + | hp                                                                                  |             |                      |               | Phage_holin_1; Bacteriophage holin (99,59/9,6e <sup>-15</sup> )                                                                                                    | Holin                              |
|    |       |       |   |                                                                                     |             |                      |               | Holin_phiLC3; holin, phage phi LC3 family, Phage proteins for bacterial lysis typically include a membrane-disrupting protein, or holin, and one or more cell wall |                                    |

|    |       |       |   |                                                          |                   |                    |                      |                                                                                                                                                                                                        |                                     |
|----|-------|-------|---|----------------------------------------------------------|-------------------|--------------------|----------------------|--------------------------------------------------------------------------------------------------------------------------------------------------------------------------------------------------------|-------------------------------------|
|    |       |       |   |                                                          |                   |                    |                      | degrading enzymes that reach the cell wall because of holin action, (99,56/1,4e <sup>-14</sup> )                                                                                                       |                                     |
|    |       |       |   |                                                          |                   |                    |                      | Holin_SPP1; holin, SPP1 family, This model represents one of more than 30 families of phage proteins, all lacking detectable homology with each other, known or believed to act as holins, (90,01/2,1) |                                     |
| 37 | 24458 | 24823 | + | Holin [ <i>Bacillus</i> virus Andromeda]                 | 3e <sup>-66</sup> |                    |                      | DUF5105; Domain of unknown function (90,98/2,9)                                                                                                                                                        | hp                                  |
|    |       |       |   | Holin [ <i>Bacillus</i> virus Blastoid]                  | 6e <sup>-62</sup> |                    |                      |                                                                                                                                                                                                        |                                     |
|    |       |       |   | Holin [ <i>Bacillus</i> virus Curly]                     | 2e <sup>-61</sup> |                    |                      |                                                                                                                                                                                                        |                                     |
|    |       |       |   | Holin [ <i>Bacillus</i> virus Finn]                      | 2e <sup>-57</sup> |                    |                      |                                                                                                                                                                                                        |                                     |
| 38 | 24987 | 25880 | + | ssDNA binding protein [ <i>Bacillus</i> phage 019DV002]  | 2e <sup>-96</sup> |                    |                      | gp32; gp32 DNA binding protein like (99,86/8,5e <sup>-21</sup> )                                                                                                                                       | Single-stranded DNA-binding protein |
|    |       |       |   | ssDNA binding protein [ <i>Bacillus</i> phage 056SW001B] | 5e <sup>-96</sup> |                    |                      |                                                                                                                                                                                                        |                                     |
| 39 | 25886 | 26239 | + | hp                                                       |                   |                    |                      |                                                                                                                                                                                                        | hp                                  |
| 40 | 26268 | 27509 | + | Helicase [ <i>Bacillus</i> virus Finn]                   | 0.0               | DnaB (21-433)      | 3.53e <sup>-50</sup> | DnaB; Replicative DNA helicase (100/9,2e <sup>-36</sup> )                                                                                                                                              | DnaB-like replicative helicase      |
|    |       |       |   |                                                          |                   | PRK07773 (21-379)  | 4.66e <sup>-22</sup> |                                                                                                                                                                                                        |                                     |
|    |       |       |   |                                                          |                   | DnaB_C (205-380)   | 3.58e <sup>-20</sup> |                                                                                                                                                                                                        |                                     |
| 41 | 27502 | 28512 | + | DNA primase [ <i>Bacillus</i> virus Riggi]               | 0.0               | dnaG (3-314)       | 5.05e <sup>-32</sup> | dnaG; DNA primase, catalytic core (100/2,7e <sup>-39</sup> )                                                                                                                                           | DnaG-like primase                   |
|    |       |       |   |                                                          |                   | Toprim_2 (212-294) | 7.14e <sup>-14</sup> |                                                                                                                                                                                                        |                                     |

|    |       |       |   |                                                                   |                    |                                        |                      |                                                                                    |                                          |
|----|-------|-------|---|-------------------------------------------------------------------|--------------------|----------------------------------------|----------------------|------------------------------------------------------------------------------------|------------------------------------------|
|    |       |       |   |                                                                   |                    | TOPRIM_DnaG<br>_primases (212-<br>285) | 2.15e <sup>-12</sup> |                                                                                    |                                          |
|    |       |       |   |                                                                   |                    | ZnF_CHCC<br>(22-73)                    | 2.60e <sup>-6</sup>  |                                                                                    |                                          |
| 42 | 28509 | 28871 | + | Putative 60 kDa<br>chaperonin<br>[Prokaryotic dsDNA<br>virus sp.] | 1.2                |                                        |                      |                                                                                    | hp                                       |
| 43 | 28879 | 29199 | + | Transcriptional<br>regulator [ <i>Bacillus</i><br>virus Riggi]    | 2e <sup>-75</sup>  | DeoR (57-88)                           | 1.66e <sup>-3</sup>  | COG5606; Predicted DNA-<br>binding protein, XRE-type HTH<br>domain (97,56/0,00094) | Putative<br>transcriptional<br>regulator |
| 44 | 29212 | 32292 | + | DNA polymerase III<br>[ <i>Bacillus</i> virus Riggi]              | 0.0                | dnaE (6-1026)                          | 0                    |                                                                                    | DNA<br>polymerase III<br>alpha subunit   |
|    |       |       |   | polc (6-989)                                                      |                    | 0                                      |                      |                                                                                    |                                          |
|    |       |       |   | PHP_PolIIIA_D<br>naE3 (6-285)                                     |                    | 3.49e <sup>-95</sup>                   |                      |                                                                                    |                                          |
|    |       |       |   | DNA_pol3_alph<br>a (297-559)                                      |                    | 4.86e <sup>-92</sup>                   |                      |                                                                                    |                                          |
|    |       |       |   | POLIIIAc (9-<br>71)                                               |                    | 2.31e <sup>-16</sup>                   |                      |                                                                                    |                                          |
| 45 | 32295 | 33140 | + | PD-(D/E)XK nuclease<br>[ <i>Bacillus</i> virus Riggi]             | 0.0                | PDDEXK_1<br>(10-196)                   | 5.16e <sup>-17</sup> | COG2887; RecB family<br>exonuclease (99,96/2,3e <sup>-26</sup> )                   | RecB family<br>exonuclease               |
|    |       |       |   |                                                                   |                    | COG2887 (12-<br>178)                   | 1.38e <sup>-4</sup>  |                                                                                    |                                          |
| 46 | 33137 | 33646 | + | Endonuclease<br>[ <i>Bacillus</i> phage Leo2]                     | 5e <sup>-109</sup> | DUF1064 (11-<br>110)                   | 1.04e <sup>-28</sup> | DUF1064 (99,67/2e <sup>-14</sup> )                                                 | Endonuclease                             |
|    |       |       |   |                                                                   |                    |                                        |                      | TnsA endonuclease, N-terminal<br>domain (99,47/2,1e <sup>-13</sup> )               |                                          |
|    |       |       |   |                                                                   |                    |                                        |                      | Phage_endo_I (99,08/1,2e <sup>-9</sup> )                                           |                                          |
| 47 | 33643 | 33915 | + | hp                                                                |                    | TM1586_NiRda<br>se (7-77)              | 3.15e <sup>-3</sup>  | TA0956 ; <i>Thermoplasma<br/>acidophilum</i> protein TA0956                        | hp                                       |

|    |       |       |   |                                                                   |                    |                      |                      |                                                                                                                                                                                                                    |                                |
|----|-------|-------|---|-------------------------------------------------------------------|--------------------|----------------------|----------------------|--------------------------------------------------------------------------------------------------------------------------------------------------------------------------------------------------------------------|--------------------------------|
|    |       |       |   |                                                                   |                    | Frm2-like (7-66)     | 6.52e <sup>-3</sup>  | (92,18/0,55)<br>tRNA-Thr_ED ; Archaea-specific editing domain of threonyl-tRNA synthetase (91,98/2)                                                                                                                |                                |
| 48 | 33971 | 34651 | + | RNA polymerase sigma 70 factor [ <i>Bacillus virus Riggi</i> ]    | 8e <sup>-164</sup> | sigma70-ECF (80-220) | 6.35e <sup>-16</sup> | spore_sigmaE; RNA polymerase sigma-E factor, Members of this family comprise the Firmicutes lineage endospore formation-specific sigma factor SigE, also called SpoIIGB and sigma (29, 99,95/4,1e <sup>-26</sup> ) | RNA polymerase sigma factor    |
|    |       |       |   |                                                                   |                    | Sigma70_r4 (169-218) | 8.79e <sup>-8</sup>  |                                                                                                                                                                                                                    |                                |
|    |       |       |   |                                                                   |                    | RpoE (79-224)        | 1.94e <sup>-7</sup>  |                                                                                                                                                                                                                    |                                |
|    |       |       |   |                                                                   |                    | PRK09647 (79-221)    | 1.75e <sup>-4</sup>  |                                                                                                                                                                                                                    |                                |
| 49 | 34648 | 34899 | + | hp                                                                |                    |                      |                      |                                                                                                                                                                                                                    | hp                             |
| 50 | 34899 | 35609 | + | Thymidylate synthase [ <i>Bacillus virus Blastoid</i> ]           | 5e <sup>-168</sup> | thyX (9-232)         | 3.98e <sup>-41</sup> | thyX; thymidylate synthase, flavin-dependent (100/1,4e <sup>-33</sup> )                                                                                                                                            | Thymidylate synthase           |
|    |       |       |   |                                                                   |                    | Thy1 (21-225)        | 2.57e <sup>-40</sup> | Thy1; Thymidylate synthase complementing protein (100/3,7e <sup>-33</sup> )                                                                                                                                        |                                |
| 51 | 35712 | 36065 | + | Cysteine-rich zinc finger protein [ <i>Bacillus virus Riggi</i> ] | 5e <sup>-82</sup>  |                      |                      | g,54,1,1 (A:) Cysteine-rich domain of the chaperone protein DnaJ (98,13/0,000026)                                                                                                                                  | DnaJ domain-containing protein |
| 52 | 36062 | 36229 | + | Protease [Human immunodeficiency virus 1]                         | 0.72               |                      |                      | PepSY_TM; PepSY-associated TM region 75,89/20                                                                                                                                                                      | hp                             |
|    |       |       |   |                                                                   |                    |                      |                      | PiuB; Uncharacterized iron-regulated membrane protein [Function unknown] (68,96/35)                                                                                                                                |                                |
|    |       |       |   |                                                                   |                    |                      |                      | Predicted membrane protein, contains DoH and Cytochrome b-561/ferric reductase transmembrane domains [Signal transduction mechanisms]                                                                              |                                |

|    |       |       |   |                                                                    |                    |                          |                     |                                                                                                                        |                         |
|----|-------|-------|---|--------------------------------------------------------------------|--------------------|--------------------------|---------------------|------------------------------------------------------------------------------------------------------------------------|-------------------------|
|    |       |       |   |                                                                    |                    |                          |                     | (63,6/45)                                                                                                              |                         |
| 53 | 36230 | 36412 | + | hp                                                                 |                    |                          |                     | Secretory carrier membrane protein [Intracellular trafficking, secretion, and vesicular transport] (75,88/19)          | hp                      |
|    |       |       |   |                                                                    |                    |                          |                     | Phage_holin_3_5; Bacteriophage holin Hol, superfamily III (61,84/41)                                                   |                         |
|    |       |       |   |                                                                    |                    |                          |                     | FeoB; Fe2+ transport system protein B [Inorganic ion transport and metabolism] (61,62/68)                              |                         |
| 54 | 36409 | 36585 | + | DNA binding protein [ <i>Bacillus</i> virus Blastoid]              | 4e <sup>-26</sup>  |                          |                     |                                                                                                                        | hp                      |
| 55 | 36798 | 37112 | + | hp                                                                 |                    |                          |                     |                                                                                                                        | hp                      |
| 56 | 37113 | 37697 | + | Deoxynucleoside monophosphate kinase [ <i>Bacillus</i> virus Finn] | 4e <sup>-143</sup> | PRK01184 (15-193)        | 1.95e <sup>-6</sup> | Deoxynucleoside monophosphate kinase Bacteriophage T4 (99,85/2,3e <sup>-19</sup> )                                     | Kinase                  |
|    |       |       |   | Phosphate mevalonate kinase [ <i>Bacillus</i> phage Leo2]          | 3e <sup>-124</sup> | P-mevalo_kinase (17-122) | 2.43e <sup>-6</sup> | Pmev_kin_anim; phosphomevalonate kinase, animal type, (99,85/5e <sup>-19</sup> )                                       |                         |
| 57 | 37697 | 38017 | + | hp                                                                 |                    |                          |                     |                                                                                                                        | hp                      |
| 58 | 38080 | 38973 | + | Serine/threonine kinase [ <i>Bacillus</i> virus Rigg]              | 0.0                | STKc_CK1 (88-149)        | 5.59e <sup>-3</sup> | d,144,1,7 (A:) Protein kinase C, theta type {Human ( <i>Homo sapiens</i> ) [TaxId: 9606]} (99,97/2,3e <sup>-29</sup> ) | Serine/threonine kinase |
| 59 | 38970 | 39401 | + | hp                                                                 |                    |                          |                     | BrnT_toxin; Ribonuclease toxin, BrnT, of type II toxin-antitoxin system (98,54,0,0000021)                              | hp                      |

|    |       |       |   |                     |     |                |                      |                                                                                                                                                  |                                                       |
|----|-------|-------|---|---------------------|-----|----------------|----------------------|--------------------------------------------------------------------------------------------------------------------------------------------------|-------------------------------------------------------|
|    |       |       |   |                     |     |                |                      | flg_new; flagellar operon protein<br>(97,96,0,000096)                                                                                            |                                                       |
| 60 | 39373 | 39789 | + | hp                  |     |                |                      | zf-C2HClx2C; Zinc-finger<br>97,1,0,0015                                                                                                          | hp                                                    |
| 61 | 39786 | 39917 | + | hp                  |     |                |                      | YycI; Two-component signal<br>transduction system YycFG,<br>regulatory protein YycI [Signal<br>transduction mechanisms],<br>(69,16/3,9)          | hp                                                    |
|    |       |       |   |                     |     |                |                      | Uncharacterized conserved<br>protein, contains TBC domain<br>[Signal transduction<br>mechanisms, General function<br>prediction only] (57,65/26) |                                                       |
| 62 | 39904 | 40248 | + | hp                  |     |                |                      |                                                                                                                                                  | hp                                                    |
| 63 | 40245 | 40478 | + | hp                  |     |                |                      |                                                                                                                                                  | hp                                                    |
| 64 | 40480 | 40791 | + | hp                  |     | N2227 (26-70)  | 7.92e <sup>-03</sup> |                                                                                                                                                  | hp                                                    |
| 65 | 40791 | 41222 | + | hp                  |     |                |                      | YifL; Predicted small<br>periplasmic lipoprotein YifL<br>(98,07/0,0000075)                                                                       | Predicted signal<br>peptide-<br>containing<br>protein |
| 66 | 41224 | 41376 | + | hp                  |     |                |                      | SPC12; Microsomal signal<br>peptidase 12 kDa subunit<br>(SPC12) (71,08/18)                                                                       | hp                                                    |
|    |       |       |   |                     |     |                |                      | Polytopic membrane protein<br>Prominin [General function<br>prediction only] (68,55/17)                                                          |                                                       |
| 67 | 41470 | 41901 | + | hp                  |     |                |                      |                                                                                                                                                  | hp                                                    |
| 68 | 42119 | 43402 | + | FtsK/SpoIIIE family | 0.0 | FtsK (190-436) | 1.55e <sup>-22</sup> | T7SS_EccC_a; type VII                                                                                                                            | FtsK/SpoIIIE-                                         |



|    |       |       |   |                                                                      |                   |                         |                      |                                                                                                   |                                  |
|----|-------|-------|---|----------------------------------------------------------------------|-------------------|-------------------------|----------------------|---------------------------------------------------------------------------------------------------|----------------------------------|
|    |       |       |   | protein [ <i>Bacillus</i> virus Riggi]                               |                   |                         |                      | secretion protein EccCa (99,87/2,8e <sup>-20</sup> )                                              | family protein                   |
|    |       |       |   |                                                                      |                   | FtsK_SpoIIIE (191-338)  | 3.25e <sup>-12</sup> | FtsK; DNA segregation ATPase FtsK/SpoIIIE and related proteins (99,76/1,5e <sup>-16</sup> )       |                                  |
|    |       |       |   |                                                                      |                   | PRK10263 (189-379)      | 7.78e <sup>-12</sup> |                                                                                                   |                                  |
|    |       |       |   |                                                                      |                   | T7_EssCb_Firm (163-389) | 2.42e <sup>-9</sup>  |                                                                                                   |                                  |
| 69 | 43665 | 43940 | + | Replication/relaxation protein [ <i>Bacillus</i> phage Leo2]         | 9e <sup>-63</sup> |                         |                      | Replic_Relax; Replication-relaxation (98,97/3,5e <sup>-9</sup> )                                  | Replic_Relax superfamily protein |
| 70 | 43953 | 44366 | + | hp                                                                   |                   |                         |                      | TrbC; TrbC/VIRB2 family (99,02/5e <sup>-9</sup> )                                                 | TrbC/VIRB2 family protein        |
|    |       |       |   |                                                                      |                   |                         |                      | VirB2; Type IV secretory pathway, VirB2 components (pilins) (98,21/0,000039)                      |                                  |
| 71 | 44441 | 44644 | + | Hypothetical protein Riggi_69 [ <i>Bacillus</i> virus Riggi]         | 2e <sup>-42</sup> |                         |                      | Arc; Arc-like DNA binding domain (97,97/0,000057)                                                 | Putative ParG-like protein       |
|    |       |       |   | Hypothetical protein ANDROMEDA_70 [ <i>Bacillus</i> virus Andromeda] | 2e <sup>-42</sup> |                         |                      | a,43,1,1 (A:) Arc repressor { <i>Salmonella bacteriophage</i> P22 [TaxId: 10754]} (97,84/0,00011) |                                  |
|    |       |       |   | DNA binding domain protein [ <i>Bacillus phage</i> 019DV002]         | 4e <sup>-25</sup> | gatA (22-43)            | 2.83e <sup>-03</sup> | a,43,1,1 (A:) Mnt repressor { <i>Salmonella bacteriophage</i> P22 [TaxId: 10754]} (97,75/0,00039) |                                  |
|    |       |       |   | DNA binding protein [ <i>Bacillus phage</i> 035JT001]                | 2e <sup>-5</sup>  |                         |                      | RHH_7; Transcriptional regulator, RHH-like, CopG (97,69/0,0002)                                   |                                  |

|    |       |       |   |                                                                           |                    |                       |                      |                                                                                                                          |                                   |
|----|-------|-------|---|---------------------------------------------------------------------------|--------------------|-----------------------|----------------------|--------------------------------------------------------------------------------------------------------------------------|-----------------------------------|
|    |       |       |   | DNA binding protein<br>[ <i>Bacillus phage</i><br>022DV001]               | 3e <sup>-5</sup>   |                       |                      | a,43,1,3 (A:) Plasmid partition<br>protein ParG { <i>Salmonella</i><br><i>enterica</i> [TaxId: 28901]}<br>(97,27/0,0021) |                                   |
| 72 | 45155 | 44664 | - | hp                                                                        |                    |                       |                      |                                                                                                                          | hp                                |
| 73 | 45914 | 45318 | - | DNA polymerase III<br>[ <i>Bacillus phage</i> Leo2]                       | 3e <sup>-120</sup> | DEDDh (5-158)         | 1.94e <sup>-38</sup> | PolC; DNA polymerase III,<br>alpha subunit (gram-positive<br>type) (99,86/1,4e <sup>-19</sup> )                          | DEDDh<br>exonuclease              |
|    |       |       |   |                                                                           |                    | EXOIII (2-163)        | 2.45e <sup>-28</sup> | Predicted exonuclease<br>(99,82/4,5e <sup>-17</sup> )                                                                    |                                   |
|    |       |       |   |                                                                           |                    | PolC (3-168)          | 2.08e <sup>-26</sup> |                                                                                                                          |                                   |
|    |       |       |   |                                                                           |                    | RNase_T (5-<br>157)   | 3.22e <sup>-26</sup> |                                                                                                                          |                                   |
| 74 | 46624 | 45911 | - | Zinc-dependent<br>metalloprotease<br>[ <i>Bacillus virus</i><br>Blastoid] | 1e <sup>-47</sup>  |                       |                      | ArdC; Antirestriction protein<br>ArdC (99,03/3,3e <sup>-9</sup> )                                                        | Putative<br>metallopeptidase      |
|    |       |       |   | Peptidase [ <i>Bacillus</i><br>phage Leo2]                                | 2e <sup>-35</sup>  |                       |                      | MPTase-PolyVal;<br>Metallopeptidase superfamily<br>domain (99,02/4,3e <sup>-9</sup> )                                    |                                   |
|    |       |       |   |                                                                           |                    |                       |                      | ImmA; Zn-dependent peptidase<br>ImmA, M78 family (98,71/6,1e <sup>-8</sup> )                                             |                                   |
| 75 | 46906 | 46625 | - | hp                                                                        |                    |                       |                      |                                                                                                                          | hp                                |
| 76 | 47212 | 47694 | + | Holliday junction<br>resolvase [ <i>Bacillus</i><br>virus Riggi]          | 3e <sup>-112</sup> | PHA00159 (59-<br>129) | 2.03e <sup>-05</sup> | Endonuclease I (Holliday<br>junction resolvase) (99,12/1,2e <sup>-9</sup> )                                              | Holliday<br>junction<br>resolvase |

|    |       |       |   |                                                       |             |                          |               |                                                                                                                                                         |                                  |
|----|-------|-------|---|-------------------------------------------------------|-------------|--------------------------|---------------|---------------------------------------------------------------------------------------------------------------------------------------------------------|----------------------------------|
|    |       |       |   | T7-like endonuclease<br>[ <i>Bacillus</i> virus Finn] | $7e^{-112}$ | Phage_endo_I<br>(59-129) | $2.59e^{-03}$ | Very short patch repair (VSR)<br>endonuclease (98,98/3,3e <sup>-9</sup> )                                                                               |                                  |
| 77 | 47698 | 47844 | + | hp                                                    |             |                          |               | b,34,1,1 (A:189-235) Biotin--<br>[acetyl-CoA-carboxylase] ligase<br>C-terminal domain { <i>Pyrococcus<br/>horikoshii</i> [TaxId: 53953]}<br>(75,62/7,5) | hp                               |
| 78 | 47834 | 47989 | + | hp                                                    |             |                          |               | e,3,1,1 (A:328-668) Penicillin<br>binding protein 2a (PBP2A), C-<br>terminal domain<br>{ <i>Staphylococcus aureus</i> [TaxId:<br>1280]} (92,85,0,3)     | hp                               |
|    |       |       |   |                                                       |             |                          |               | CheD; Chemotaxis receptor<br>(MCP) glutamine deamidase<br>CheD [Cell motility, Signal<br>transduction mechanisms],<br>(86,32/1,9)                       |                                  |
|    |       |       |   |                                                       |             |                          |               | CheD ; CheD chemotactic<br>sensory transduction (85,49/3)                                                                                               |                                  |
|    |       |       |   |                                                       |             |                          |               | e,3,1,1 (A:293-692) Penicillin-<br>binding protein 2, PBP2<br>{ <i>Staphylococcus aureus</i> [TaxId:<br>1280]} (85,24/2,5)                              |                                  |
| 79 | 48019 | 48171 | + | hp                                                    |             |                          |               | Transcription factor (contains Zn<br>finger) [Transcription]<br>(97,87/0,0000064)                                                                       | Putative DNA-<br>binding protein |
|    |       |       |   |                                                       |             |                          |               | CpXC; CpXC protein<br>(97,66/0,000054)                                                                                                                  |                                  |
|    |       |       |   |                                                       |             |                          |               | Transcription factor BLIMP-<br>1/PRDI-BF1, contains C2H2-<br>type Zn-finger and SET domains<br>[Transcription] (97,34/0,00009)                          |                                  |

|    |       |       |   |                                                                              |                   |  |  |                                                                    |                             |
|----|-------|-------|---|------------------------------------------------------------------------------|-------------------|--|--|--------------------------------------------------------------------|-----------------------------|
|    |       |       |   |                                                                              |                   |  |  | Transcriptional repressor SALM<br>[Transcription] (97,3/0,0000097) |                             |
| 80 | 48173 | 48319 | + | hp                                                                           |                   |  |  |                                                                    | hp                          |
| 81 | 48492 | 49166 | + | Putative terminase<br>small subunit<br>[ <i>Bacillus</i> phage<br>056SW001B] | 1e <sup>-73</sup> |  |  | sm_term_P27; phage terminase,<br>small subunit, (92,77/0,94)       | Terminase, small<br>subunit |
|    |       |       |   |                                                                              |                   |  |  | Terminase_4; Phage terminase,<br>small subunit (91,46/2)           |                             |
|    |       |       |   |                                                                              |                   |  |  | COG3747; Phage terminase,<br>small subunit (90,62/2,5)             |                             |

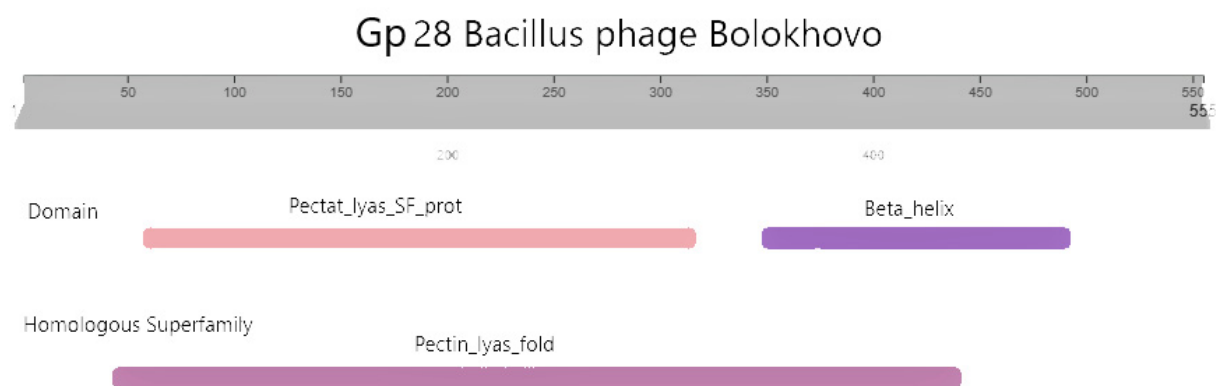

Figure S1. Domain organization of the depolymerase Gp28 of Bolokhovo

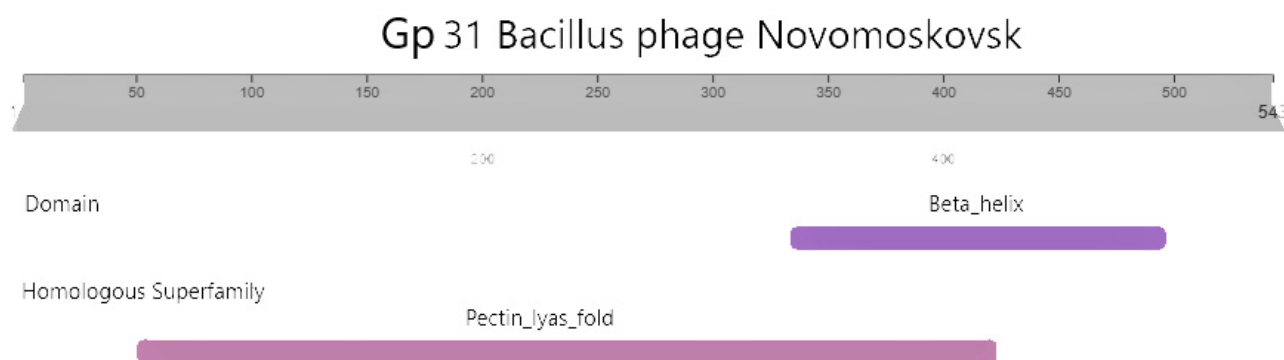

Figure S2. Domain organization of the depolymerase Gp31 of Novomoskovsk
